# Supplementary material
Source: publisher figshare collection journal article supplement (https://karger.figshare.com/ndownloader/files/31314049)
Supplement: Supplementary file 1 [file 31314049]

# The association between serum bilirubin and kernicterus spectrum disorder: A systematic review and meta-analysis

# Online supplementary data

# Page of contents

# Supplement 1: MEDLINE (PubMed), EMBASE and CENTRAL search strategies….……………………….2-3

# Supplement 2: Detailed description of the methods……………………………………………………………4-7

# Supplement 3: eTable 1-Characteristics of included studies………….……………………………………....8-24

# Supplement 4: Citation of shortlisted (included and excluded) articles………………....…………………..25-33

# Supplement 5: Full report of effect estimates ……………………………………………………………....34-39

# Supplement 6: eTable 2 - Summary of findings tables with certainty of evidence rating ………………….40-45

## Appendix 1: search strategies

## 1 Medline (PubMed) search strategy

#1 infant* [TIAB]

#2 "Infant, newborn"[Mesh]

#3 newborn* [TIAB]

#4 neonat* [TIAB]

#5 (#1 OR #2 OR #3 OR #4)

#6 bilirubin [Mesh]

#7 bilirubin [TIAB]

#8 (#6 OR #7)

#9 bilirubin encephalopathies[MeSH Terms]

#10 bilirubin encephalopath*[Title/Abstract]

#11 kernicterus[MeSH Terms]

#12 kernicterus[Title/Abstract]

#13 "bilirubin induced neurologic dysfunction"[Title/Abstract]

#14 brain injuries[MeSH Terms]

#15 brain injur*[Title/Abstract]

#16 (#9 or #10 OR #11 OR #12 OR #13 OR #14 OR #15)

#17 (#5 AND #8 AND #16)

## 2 EMBASE search strategy

1. (Infant*) in TI, AB

2. Explode “infant, newborn”/all subheadings

3. (newborn*) in TI, AB

4. (neonat*) in TI, AB

5. #1 OR #2 OR #3 OR #4

6. Explode “bilirubin”/all subheadings

7. (bilirubin) in TI, AB

8. #6 OR #7

9. Explode “bilirubin encephalopathies”/all subheadings

10. (bilirubin encephalopath*) in TI, AB

11. Explode “kernicterus”/all subheadings

12. (kernicterus) in TI, AB

13. (“bilirubin induced neurologic dysfunction”) in TI, AB

14. Explode “brain injuries”/all subheadings

15. (brain injur*) in TI, AB

16. #9 or #10 OR #11 OR #12 OR #13 OR #14 OR #15

17. #5 AND #8 AND #16

## 3 CENTRAL search strategy

1. MeSH descriptor: [Infant, Newborn]explode all trees

2. (newborn*):ti,ab,kw

3. (neonat*):ti,ab,kw

4. (infant*):ti,ab,kw

5. #1 OR #2 OR #3 OR #4

6. MeSH descriptor: 43explode all trees

7. (Bilirubin):ti,ab,kw

8. #6 OR #7

9. MeSH descriptor: [Kernicterus] explode all trees

10. (kernicterus):ti,ab,kw

11. (bilirubin encephalopath*):ti,ab,kw

12. (“bilirubin induced neurologic dysfunction”):ti,ab,kw

13. MeSH descriptor: [Brain Injuries] explode all trees

14. (brain injur*):ti,ab,kw

15. #9 OR #10 OR #11 OR #12 OR #13 OR #14

16. #5 AND #8 AND #15

## Appendix 2: Detailed description of the methods

## Data collection and analysis

***Data extraction and management***

Two review authors (JPG and NML) independently screened the articles based on the titles and abstracts and generated a shortlist of potentially eligible studies. We then assessed the shortlisted studies in more detail to determine final eligibility. We coded all data from each eligible study using a pro forma designed specifically for this review, developed according to the CHARMS checklist1. We focused on TSB value, or any classification of infants based on a certain TSB threshold, and extracted the information as our main predictive or prognostic factor, as this is the main parameter on which management on neonatal jaundice is currently based. We also extracted, as our secondary prognostic factors, clinical and other laboratory risk factors, and the outcome of KSD and its related complications. Each review author cross-checked entry made initially by another author to detect error or duplication, and resolved disagreement by discussion leading to a consensus, with referral to a third review author (CFG) if necessary.

***Assessment of risk of bias in included studies***

Two authors (JPG and NML) assessed the risk-of-bias (RoB) of the included studies in duplicates using the QUIPS tool2, which comprises 28 items under six domains (study participation, study attrition, prognostic factor measurement, outcome measurement, study confounding and statistical analysis and reporting), with possible ratings of low, moderate or high risk. We judged the overall RoB of the study based on a global assessment on the RoB across the six domains, using the following criteria as a guide3 after a round of deliberation among the review authors: if all domains are classified as having low RoB or not more than one medium RoB, the study is considered to have an overall low RoB. If one or more domains are classified as having high RoB or ≥3 with medium RoB, the study is then considered to have high RoB. All studies in between are considered to have medium RoB. We discussed any disagreement with the third author (AAK) serving as arbitor if necessary. We planned to use the overall risk of bias status of the study in two areas: first, our sensitivity analysis, in which we determined the impact of excluding studies with overall high risk of bias on the pooled estimate (as detailed under the heading of Sensitivity analysis), and next, the certainty of evidence rating using the GRADE approach, where we downgrade the certainty of evidence by one or two levels if we considered the study to be of serious or very serious concern with regards to its risk-of-bias status (as detailed in the subsequent segment on certainty of evidence rating).

***Measures of association between the predictive or prognostic factor and the outcome***

We extracted the adjusted effect measures, mainly in the form of adjusted odds ratio or risk ratio. Our chief independent variable was TSB measured either in mg/dl or micromol/L. Additionally, we extracted other possible prognostic factors such as haemolysis, sepsis, acidosis, prematurity and demographic factors. Our chief dependent variable was KSD, defined broadly as in our definition of outcome.

The effect measures were extracted with their uncertainties, expressed as standard errors, variances or 95% confidence intervals to be pooled in our meta-analysis. We converted the adjusted risk ratio to adjusted odds ratio in our analysis using the RevMan calculator, and expressed our results using adjusted odds ratio.

We summarised the results of the trials narratively if pooled analyses were not possible.

***Dealing with missing data***

If effect measures (such as adjusted odds ratio or risk ratio) and their measures of precision (such as 95% confidence interval, SE or SD) were not reported in the included studies, we would attempt to derive the corresponding measures where possible by using information provided in the paper by referring to the approach suggested in Altman et al 20034. If this was impossible, we would summarise the findings of the studies narratively.

We determined the dropout rates from each trial, and considered a dropout rate of higher than 20% as significant. If we found a significant dropout rate with no reasonable explanation, we assigned the trial as having high risk-of-bias in the criterion related to missing data. If we considered the extent of missing data to be critical to the final estimates in our meta-analysis, we planned to contact the authors of the individual trials to request further information.

In this review, most studies were judged to have low risk of bias in the area of missing data as most studies had complete follow-up especially when the outcomes were assessed during the NICU stay. Should there have been studies that were at high risk of attrition bias, we would have performed sensitivity analyses to assess how the overall results were affected with and without the inclusion of such studies.

***Dealing with heterogeneity***

We used I² statistics to quantify the degree of inconsistency in the results, in accordance with the recommendations of the Cochrane Handbook. We used the cut-off of 75% to indicate substantial heterogeneity. As heterogeneity is inherent in a body of prognostic studies, our adopted threshold is higher than that usually adopted for a review of randomised controlled trials5.

If the I statistics was above 75%, we would explore the following criteria to determine plausible factor/s that could explain the degree of heterogeneity:

- Baseline characteristics of the participants (gestational age, birth weight, presence of concurrent risk factors such as haemolysis), and definition of hyperbilirubinaemia (namely, by the use of different cut-offs of TSB).
- Clinical settings of the studies (e.g. tertiary or secondary neonatal unit).
- Interventions used to manage neonatal hyperbilirubinaemia
- Risk of bias.

If we identified plausible factor/s from the criteria above that could explain a major part of heterogeneity, by virtue of a substantial reduction of I2 estimate following the removal of the studies concerned, we would determine whether the difference between study characteristics was too great for a meta-analysis to be appropriate, and if a meta-analysis is still appropriate, whether to separate the studies into different subgroups based on the plausible sources of heterogeneity.

***Assessment of reporting deficiencies***

We used the funnel plot to screen for reporting deficiencies or publication bias if there were sufficient included studies (greater than 10) using the same measures to report the association. If reporting deficiencies or publication bias was suggested by a clear asymmetry of the funnel plot, we planned to include a statement in our results with a corresponding note of caution in our discussion, bearing in mind the limitations of funnel plot in detecting publication bias especially in studies on prognosis6. We planned to use statistical test recommended for prognosis studies, such as the Begg's test to quantify possible degree of publication bias, as the test is robust across situations of high and low heterogeneity with normally and non-normally distributed data7. In this review, there were insufficient studies for each reported association, so no formal assessments of reporting deficiencies were performed. However, a suspicion on publication bias has been incorporated in our assessment on the certainty of evidence for the analysis that compared TSB values between infants with and without KSD with an explanation on the footnote, because we considered it reasonable to expect more publication than that were currently available (please refer to the GRADE rating document in *Appendix 6*)

***Data synthesis and meta-analysis approaches***

While we extracted all outcome data that were suitable for meta-analysis, meta-analysis was possible if there were at least two studies with sufficiently robust and comparable estimates of the association between the predictive factor and the outcomes. Specifically, we pooled study data on the association of TSB with KSD assessed in the same period in a similar manner using the same estimates such as adjusted Odds Ratio (OR), or risk ratio (RR). We converted all estimates to Odds Ratio (OR) using the RevMan calculator to standardise the estimates. We extracted all data from adjusted estimates from multivariate analysis, apart from the data in analysis 3 that compared the TSB values of infants with and without KSD. We performed meta-analysis via generic inverse variant approach8 using a random effect model to allow for unexplained heterogeneity across studies that is inherent in all prognosis studies9.

For studies in which meta-analysis was impossible, for example, studies with descriptive reports of serum bilirubin and KSD without an appropriate evaluation of their association via methods such as logistic regression, we summarised the results narratively.

For the outcome of developmental screening test scores between infants with and without hyperbilirubinaemia, we pooled effect estimates from studies that used different scales of assessment using standardised mean difference. We converted all mean differences into standardised mean differences by dividing the mean differences and their corresponding SEM with the SD of the whole participant group (which we either derived from combining the SDs of the exposed and non-exposed groups or where these were not provided, adopted a typical SD of the scale as given by the author10).

***Subgroup analysis and investigation of heterogeneity***

If sufficient data were available, we planned to perform the following subgroup analyses:

1. Study design (cohort or registry-based, RCT-based or case control)
2. Population (setting of the study (developed vs developing countries), term vs preterm infants, general newborn population vs selected "high-risk" infants based on serum bilirubin value and/or clinical assessment)
3. Predictive factors (methods of serum bilirubin measurement (e.g. serum or transcutaneous), e.g. maximum value vs mean value, timing of measurement)
4. Outcome measurement, e.g. different conditions in the spectrum of KSD, different definition of each condition.

We planned to use random effect meta-regression (Berkey et al, 1995) to test subgroup differences if one or more study-level covariate that we consider as possible effect modifier for the outcomes concerned (risk of KSD and related conditions) are clearly stated in the studies, such as the gestation period, birth weight, presence or absence of symptoms suggestive of KSD, presence or absence of symptoms suggestive of pathological hyperbilirubinaemia, such as that due to haemolytic process from any cause, and/or infection, and if there were more than 10 included studies.

In this review, data were insufficient for us to perform the subgroup analysis based on the aforementioned factors.

***Sensitivity analysis***

We planned to perform sensitivity analyses provided a sufficient number of trials were included to assess the impact of excluding trials with high risk of attrition bias, although such analysis was not required, as most studies had complete data for the major outcomes assessed.

***Rating of certainty of evidence and summary of findings table***

We rated the certainty of evidence using the Grades of Recommendation, Assessment, Development, and Evaluation (GRADE) approach adapted for studies on prognosis11,12. Two review authors (NML, KHCJ) independently assessed the certainty of the evidence. We considered evidence from a body of well-conducted observational studies or a single arm of randomised controlled trials (RCT) as high-certainty by default, but downgraded the evidence one level for serious (or two levels for very serious) limitations based upon the following: phase of investigation, study limitations (risk-of-bias), consistency across studies, directness of the evidence, precision of estimates, and presence of publication bias. We accepted greater degree of heterogeneity compared to interventional studies, as detailed under the previous heading of dealing with heterogeneity, because differences in measurement methods, adjustment factors and statistical analyses, amongst others give rise to inevitable heterogeneity among studies on prognosis. We also put due consideration in the domain of publication bias, as selective reporting or publication bias is considered as more likely in prognosis than intervention studies due probably to the greater proportion of negative results in studies considered as exploratory or preliminary, suboptimal reporting and inappropriate analysis methods13. We upgraded the certainty of evidence based on the following criteria: large effect and a dose-response gradient. We manually constructed a 'Summary of findings' tables to report the quality of the evidence.

The GRADE approach results in an assessment of the quality of a body of evidence in one of four grades:

- High: we are very confident that the true effect lies close to that of the estimate of the effect.
- Moderate: we are moderately confident in the effect estimate: the true effect is likely to be close to the estimate of the effect, but there is a possibility that it is substantially different.
- Low: our confidence in the effect estimate is limited: the true effect may be substantially different from the estimate of the effect.
- Very low: we have very little confidence in the effect estimate: the true effect is likely to be substantially different from the estimate of effect.

## References

1. Moons KGM, de Groot JAH, Bouwmeester W, et al. Critical Appraisal and Data Extraction for Systematic Reviews of Prediction Modelling Studies: The CHARMS Checklist. *PLoS Med.* 2014;11(10):e1001744.

2. Hayden JA, van der Windt DA, Cartwright JL, Côté P, Bombardier C. Assessing bias in studies of prognostic factors. *Annals of internal medicine.* 2013;158(4):280-286.

3. Grooten WJA, Tseli E, Äng BO, et al. Elaborating on the assessment of the risk of bias in prognostic studies in pain rehabilitation using QUIPS-aspects of interrater agreement. *Diagnostic and prognostic research.* 2019;3:5.

4. Altman DG, Bland JM. Interaction revisited: the difference between two estimates. *BMJ.* 2003;326(7382):219.

5. Reeves BC, Deeks JJ, Higgins JPT, Shea B, Tugwell P, Wells GA. Chapter 24: Including non-randomized studies on intervention effects. In: *Higgins JPT, Thomas J, Chandler J, Cumpston M, Li T, Page MJ, Welch VA (editors). Cochrane Handbook for Systematic Reviews of Interventions version 6.1 (updated September 2020).* Cochrane, 2020. Available from <www.training.cochrane.org/handbook>.

6. Debray TA-O, Moons KGM, Riley RD. Detecting small-study effects and funnel plot asymmetry in meta-analysis of survival data: A comparison of new and existing tests. (1759-2887 (Electronic)).

7. Begg CB, Mazumdar M. Operating characteristics of a rank correlation test for publication bias. *Biometrics.* 1994;50(4):1088-1101.

8. *Review Manager 5.4* [computer program]. The Cochrane Collaboration; 2019.

9. Debray TPA, Damen JAAG, Snell KIE, et al. A guide to systematic review and meta-analysis of prediction model performance. *BMJ.* 2017;356:i6460.

10. Newman TB, Liljestrand P, Jeremy RJ, et al. Outcomes among newborns with total serum bilirubin levels of 25 mg per deciliter or more. *The New England journal of medicine.* 2006;354(18):1889-1900.

11. Foroutan F, Guyatt G, Zuk V, et al. GRADE Guidelines 28: Use of GRADE for the assessment of evidence about prognostic factors: rating certainty in identification of groups of patients with different absolute risks. *Journal of clinical epidemiology.* 2020;121:62-70.

12. Lorio Alfonso, Spencer Frederick A, Falavigna Maicon, et al. Use of GRADE for assessment of evidence about prognosis: rating confidence in estimates of event rates in broad categories of patients. *BMJ : British Medical Journal.* 2015;350:h870-h870.

13. Lorio A, Spencer FA, Falavigna M, et al. Use of GRADE for assessment of evidence about prognosis: rating confidence in estimates of event rates in broad categories of patients. *BMJ : British Medical Journal.* 2015;350:h870.

#

# Appendix 3

# eTable 1: Characteristics of included studies

| **Last name of first author** | **Year** | **Study design** | **Population description** | **Participant Exclusion criteria** | **Country (s)** | **Total no of participants** | **Names of outcome (e.g. kernicterus, BIND, hearing impairment etc)** | **Time of outcome measurement** | **Rate of KSD (%)** | **Name of predictor** | **Other covariates (to be adjusted, like gestational age, birth weight, co-morbidities etc)** |
| --- | --- | --- | --- | --- | --- | --- | --- | --- | --- | --- | --- |
|
| Amin | 2001 | Prospective cohort study | All premature newborn, 28 to 32 weeks’ gestational age, admitted to the NICU from July 1996 to July 1998 | Hypothermia, chromosomal abnormalities, TORCH infections, instability for baseline testing | US | 143 | Auditory brainstem responses (ABR) | During the first postnatal week | 38.40 | Serum total bilirubin (peak), serum, albumin (B/A ratio) | Gestational age, birth weight, gender, Apgar score, hemolysis, sepsis, pC02, pH, p02, intraventricular hemorrhage, albumin |
| Ardakani | 2011 | Prospective cohort study | Admission in neonatal ward and severe hyperbilirubinemia (SB > 18 mg/dl) | Hydrops fetalis, congenital nephritic syndrome, diseases that mimic BIND, death due to other reasons | Iran | 52 | Acute BIND (based on clinical findings) | At discharge | 9.60 | Total serum bilirubin (mean), B/A ratio | Blood group incompatibility (ABO, rh), mode of delivery (univariate) |
| Arnolda | 2015 | Retrospective cohort study | Diagnose of ABE at hospital presentation | None | Myanmar | 590 | Acute bilirubin encephalopathy |  | 17.60 | Risk factors for ABE, Total serum bilirubin (TSB) (on admission) | Preterm, previous sibling, significant "bruising", suspected infection, G6PD, ABO, Rh (univariate) |
| Bao | 2013 | Retrospective observational study | Infants with GA > 35 weeks and with ABE | Chromosomal disorders, cranio-facial malformations, family history of hearing loss since childhood | China | 116 | Acute bilirubin encephalopathy or kernicterus |  |  | Peak total serum bilirubin (peak) | Perinatal asphyxia, ABO and Rh, sepsis and infection, birth trauma (univariate) |
| Behjati-Ardakani | 2006 | Prospective study | Neonates with icterus admitted for treatment of hyperbilirubinemia from 2003-2004 |  | Iran | 305 | ABE or kernicterus, hearing loss | “As soon as signs and symptoms appear” | 8.20 | Total serum bilirubin (peak) |  |
| Besli | 2020 | Prospective cohort study | Gestational age, ≥ 37 weeks, birth weight, ≥2500 g; sTB levels above physiological limits that required treatment | Asphyxia, birth trauma, metabolic disorders (hypoglycemia, hypocalcemia, acidosis, electrolyte disorder and hypoalbuminemia); neonatal infections; intrauterine infection, congenital metabolic disease, congenital anomaly, pathologies that may lead to neonatal cerebral damage such as intracranial hemorrhage; and family history of hearing loss, and suitability for long term follow-up | Turkey | 207 | Hearing acuity (ABR, OAE and tympanometry), Auditory Brainstem responses Otoacoustic emissions, Denver II Developmental Screening Test. | Postnatal 18-24th months | 12.2 | TSB (peak) and duration of exposure to sTB levels >20 mg/dl | Neurological dysfunction (clinical assessment) (univariate) |
| Bozkurt | 2020 | Prospective cohort study | Infants with ≥35 weeks of gestation admitted with diagnosis of severe hyperbilirubinemia in a period of 18 months. | Infants born at <35 weeks of gestation and with congenital /chromosomal anomalies were excluded. | Turkey | 115 | “Severe hyperbilirubinemia”, acute bilirubin encephalopathy (ABE) | First 6 h of admission | 39.10 | Total serum bilirubin (mean), B/A ratio | G6PD, ABO and Rh, being refugee, early discharge (univariate), G6PD, early discharge, being refugee, rh isoimmunisation (multivariate) |
| **Colak** | 2016 | Retrospective study | Hospitalized infants with serum total bilirubin levels ≥25 mg/dl |  | Turkey | 36 | Neurodevelopmental outcomes | Postnatal 12 and 24 months |  | Total serum bilirubin > 25 mg/dl (peak) | No other factors mentioned (abstract only) |
| Diala | 2018 | Prospective longitudinal hospital-based observational study | Newborns treated for jaundice between February 2014 and June 2015 (9 major hospitals) | Undocumented outcomes, deaths from unrelated causes, weighing < 1000g | Nigeria | 1040 | Presence of ABE subdivided into mild ABE, moderate/ severe ABE, death from ABE, or ABE/ suspect sepsis | Not stated | 15.30 | Risk factors for ABE, TSB (on admission) | TSB, age at admission, weight, mother’s age, no of antenatal care, site of birth (hospital or outside) (univariate), non-alloimmune hemolysis, 1 or no antenatal visit, delayed in receiving care, out-of-hospital birth and type of birth attendance (multivariate) |
| Donneborg | 2020 | Retrospective registry-based study | TsB ≥ 450 µmol/L, ratio of conjugated to total bilirubin < 0.30, gestational age ≥35 weeks and age ≤4 weeks. (nationwide study) | Conjugated hyperbilirubinemia, gestational age <35 weeks, and postnatal age >4 weeks | Denmark | 408 | KSD, ABE | Not stated | 2.94 | total serum bilirubin (TSB, peak) ≥ 450 µmol/L, ratio of conjugated to total bilirubin < 0.30 | ABO isohemolytic disease, cephalohematoma, galactosemia, rhesus hemolytic disease, spherocytosis, G6PD def, congenital hypothyroidism (descriptive) |
| Duman | 2004 | Prospective study | Otherwise healthy singleton term newborn infants with marked indirect hyperbilirubinemiaduring first 2 weeks of life. | Blood group incompatibilities, positive Coombs' test, G6PD deficiency, any laboratory evidence of hemolytic disease, perinatal factors such as maternal diabetes mellitus, polycythemia,cephalhematoma, asphyxia, intracranial hemorrhage, perinatal infection, dehydration, infants with metabolic or major congenital abnormalities | Turkey | 60 | Clinical and laboratory features of ABE | 2-6 years of age |  | Marked hyperbilirubinemia > 20 mg/dl, peak TSB (during first two weeks of life) | Sociodemographic characteristics, mode of delivery (univariate) |
| Ebbesen | 2012 | Retrospective study | All infants born at gestational age > 35 weeks in Denmark between 2000-2007 with a TSB > 450µmol/L | Not stated | Denmark | 502766 | Bilirubin encephalopathy |  | 0.01 | Total serum bilirubin levels (peak) | Clinical signs and symptoms of infants with ABE, possible aetiology including ABO incompatibility, G6PD deficiency (descriptive) |
| ElTatawy | 2019 | Prospective cohort study | 177 term/near-term infants admitted for neonatal hyperbilirubinemia. | admission age > 14 days, perinatal hypoxia, < 35 weeks gestation, clinical disease other than jaundice and unable to attend follow up | Egypt | 177 | Psychomotor (PDI) and mental developmental indices (MDI) using BSIDII. Auditory impairment using Auditory Brainstem Response (ABR) | In the first year of life | 13.60 | Total serum bilirubin (TSB) (on admission) | BIND score, duration of exposure to hyperbilirubinaemia, hemolysis (correlation with impaired MDI and PDI at different periods of assessment) |
| Hameed | 2011 | Retrospective observational study | Term and late preterm infants admitted to Children Welfare Teaching Hospital for management of severe neonatal jaundice during a 4-month period in 2007 and 2008 | Direct hyperbilirubinemia, cholestasis, low risk hyperbilirubinemia | Iraq, US | 162 | Acute , advanced and chronic bilirubin encephalopathy |  | 22.20 | Total serum bilirubin (peak) | Home delivery, sepsis, ABO/Rh disease, presence of ABE (for long-term adverse outcomes - chronic kernicterus or death) (univariate) |
| **Harris** | **2001** | Retrospective study | Infants (from 1993-1996) >/=36 weeks' gestational age who were readmitted to the hospital during the first week of life with bilirubin levels >25 mg/dL |  | US | **6** | Bilirubin encephalopathy |  |  | Total serum biliruin > 25 mg/dl (peak) | Clinical signs, sepsis (descriptive). |
| Iskander | 2014 | Prospective longitudinal observational study | Term/ near term infants admitted for severe jaundice | Not stated | Egypt | 193 | Neurologic status, auditory impairment, BIND score | At admission and post-treatment | 30 | TSB (peak), B/A ratio | Clinical risk factors (like low birth weight, hemolysis) not included in univariate or multivariate analyses. |
| Jangaard | 2008 | Retrospective population-based cohort study | Healthy term/ near term infants > 35 weeks gestational age with serum bilirubin levels > 325µmol/L born between 1994 and 2000 | Rh factor isoimmunization, significant congenital or chromosomal abnormalities, or severe peripartum asphyxia Apgar scores of 3 at 5 minutes of age, or documented hypoxic- ischemic encephalopathy | Canada | 56019 | Deafness, cerebral palsy, developmental delay, gaze palsy, attention-deficit disorder, autism spectrum disorders and a composite of all outcomes | Follow-up periods ranged from 2 to 9 years |  | Total serum bilirubin (peak) defined as TSB levels of 230 mol/L ( 13.5 mg/dL) | Year of birth, region of residence, marital status, maternal age, parity (number of previous viable pregnancies), gravidity (number of previous pregnancies), multiple birth, any breastfeeding at discharge, maternal smoking at the time of birth admission, type of delivery (vaginal versus cesarean), preterm delivery, infant gender, small-for-gestational age status, infection, fetal malnutrition, evidence of mild birth depression, respiratory distress syndrome, infant anemia, intrauterine hypoxia (defined as polycythemia or reticulocytosis), ABO isoimmunization, gestational diabetes mellitus, and pre-existing maternal diabetes mellitus (effect sizes not reported in multivariate analysis) |
| Kang | 2020 | Prospective nested case control study | Newborns of gestational age ≥ 35 weeks and diagnosed with ABE were included in the study | (1) Hypoxic-ischemic encephalopathy, hypoglycemic encephalopathy, and neonatal encephalopathy with infection; (2) Congenital brain injury such as genetic, metabolic, and malformation diseases; (3) Congenital auditory deformity. | China | 87 | ABE (BIND score), hearing (AABR), brain MRI. | Surviving infants were followed up at 3, 6, 12, and 18 months |  | TSB peak value and B/A ratio | Hemolysis (ABO and Rh), sepsis, haemorrhage, MRI abnormal, abnormal ABR, BIND score (bivariate logistic regression) (we only included sepsis in the meta-analysis as we considered abnormal BIND score and abnormal AABR findings as part of the criteria for diagnosing ABE) |
| Kumar | 2016 | Prospective study | Neonates > 35 weeks gestation admitted to NICU with a serum bilirubin >20 mg% in first 72 h of life or >25 mg% | Neonates with Apgar score <3 at 5 min, hypoxic ischemic encephalopathy at stage 3, major congenital malformations, conjugated bilirubin >2 mg%, metabolic disorders, and meningitis were excluded. | North India | 64 | Bilirubin encephalopathy, mortality, risk factors for development of ABE. | Discharged neonates were followed at 1, 3, and 6 months for chronic bilirubin encephalopathy (CBE). | 44 | TSB not assessed as a predictor (infants enrolled were those with high TSB). | Admission weight, home delivery, top feeding, Rh or ABO incompatibility, positive Coombs, sibling's with jaundice, G6PD def., culture proven sepsis, hypalbuminaemia, normal vaginal delivery, early discharge (all univariate OR not reported) |
| Morioka | 2015 | Retrospective cohort study | Extremely low birth weight (ELBW) infants with clinical kernicterus | Not stated | Japan | 18 | Clinical kernicterus | Retrospective |  | Total bilirubin (peak), serum unbound bilirubin |  |
| Murki | 2001 | Prospective cohort study | Term neonates with severe non-hemolytic jaundice | Hemolysis, major congenital malformations | India | 64 | Kernicterus |  | 21.80 | Peak. total serum bilirubin, free bilirubin, serum albumin, B/A ratio, free fatty acid level | Gestation, birth weight, asphyxia |
| Nabavi | 2011 | Prospective descriptive analytic study - only English abstract provided | Healthy term infants > 37 weeks who required treatment or was treated with phototherapy or exchange transfusion for elevated bilirubin levels or jaundice | Not stated | Germany | 64 | Hearing impairment | 2 year period (2007-2009) | 4.70 | Serum bilirubin | Not stated |
| Nakamura | 1992 | Prospective cohort study | Low birthweight infants treated with phototherapy for non-hemolytic hyperbilirubinemia | Hemolytic diseases, grade 3 IVH, CNS abnormalities | Japan | 138 | Kernicterus | 3 years follow up period |  | Serum unbound bilirubin, total serum bilirubin | Birth weight and gestational age (all descriptive) |
| Nasiri | 2018 | Retrospective cohort study | Infants with hyperbilirubinemia referred to the clinic of pediatric neurology during the years 2011 to 2016 |  | Iran | 19 | Kernicterus | Clinic follow-up |  | TSB, other risk factors of kernicterus | ABO, Rh incompatilibity, G6PD (only narrative description) |
| Newman | 1993 | Prospective cohort study | Infants with TSB recorded and survived beyond 1 year | “Nonsingleton births, and 5827 with birth weight <2500 g (n = 5601) or unknown (n = 226). Second, we excluded 3595 infants with race other than black or white, because the number of such infants was too small for separate consideration and the differences observed between blacks and whites made us reluctant to include infants of other races with either group. Finally, we excluded 2510 infants for whom no bilirubin measurements were recorded, and 391 who died before their first birthday.” | US | 41324 | IQ, neurologic examination, sensorineural hearing loss | IQ at age 7 years, neurologic examination at age 1 and 7 years, sensorineural hearing loss at age 3 and 8 years. | 0.16 | Peak TSB, total serum bilirubin > 25 mg/dl | birth weight, birth weight squared, maternal education, feeding method, gender oxytocin use, direct Coombs’ test, prematurity and race (results of analysis in these factors not reported) |
| Newman | 2006 | Prospective cohort study | Infants with total serum bilirubin levels of 25 mg per deciliter or more within 30 days after birth (the case subjects) or were randomly selected (the controls) from the birth cohorts of 1995 through 1996 and 1997 through 1998 in a 1:1 ratio of projected subjects |  | US | 559 | Adverse neurodevelopmental outcomes of hyperbilirubinemia (kernicterus) | Data on outcomes were obtained from electronic records, interviews responses to questionnaires, and neurodevelopmental evaluations |  | Total serum bilirubin > 25 mg/dl (peak) | Assessments of parental depression , G6PD status, haemolysis (results of direct antiglobulin test). family income, parents’ races and educational levels, maternal age, maternal smoking status, sex, gestational age, small size for gestational age (below the 10th percentile), five-minute Apgar score, initial exclusive breast-feeding, parental depression, and examining clinician (these factors were either not included in multivariate analysis or their effects not reported) |
| Ochigbo | 2016 | Retrospective descriptive review | Newborns diagnosed with bilirubin encephalopathy from January 2010 to December 2014 | Not stated | Nigeria | 21 | Bilirubin encephalopathy |  |  | Total serum bilirubin (peak) | Septicaemia, ABO incompatibility, G6PD deficiency (descriptive only) |
| Ogunlesi | 2011 | Prospective cohort study | Term infants presenting with moderate to severe jaundice defined as total serum bilirubin (TSB) of at least 15 mg/dl at the point of admission | Preterm babies, babies with TSB <15 mg/dl and babies who developed jaundice after hospitalization | Nigeria | 152 | Acute bilirubin encephalopathy |  | 49.30 | Total serum bilirubin (admission) | Severe anaemia, acidosis, hypoglycaemia, low social economic classes, delayed presentation |
| Oh | 2003 | Retrospective cohort study | ELBW infants (401–1000 g) who survived to 14 days of age in the 12 participating centers of the National Institute of Child Health and Human Development Neonatal Research Network between January 1, 1994, and December 31, 1997 | PSBs that were recorded beyond the first 14 days of life | US | 3246 | Neurodevelopmental outcomes (cerebral palsy, hearing impairment, blindness) | At 18-22 months' corrected age |  | Peak total serum bilirubin | Demographic risk factors of birth weight; male sex; mother younger than 20 years; mother not a high school graduate; Medicaid insurance recipient; and clinical risk factors of antenatal steroids, surfactant therapy, intraventricular haemorrhage (IVH) grade 3 or 4, chronic lung disease (CLD), periventricular leukomalacia (PVL), late-onset sepsis, proven necrotizing enterocolitis (NEC), postnatal steroids. |
| Ou | 2020 | Retrospective observational study | Extreme hyperbilirubinemia newborns hospitalized from January 1, 2012 to December 31, 2019. The inclusion criteria were as follows: TSB ≥ 25mg/dl (428 μmol/L), gestational age (GA) ≤ 35 weeks, and age at admission ≤14 days. | Conjugated bilirubin >20% TSB, intracranial infection, hypoxic–ischemic encephalopathy, chromosome abnormality, and congenital craniocerebral malformation | China | 517 | ABE | Within 24 hours of admission | 19.7 | Total serum bilirubin | GA, premature rupture of membranes, type of delivery, birth weight (BW), type of feeding, mother's age, hypertensive disorders in pregnancy, gestational diabetes mellitus, intrauterine distress, and meconium-stained amniotic fluid. The pathological information included cranial hematoma, intracranial hemorrhage, isoimmune hemolysis, sepsis, polycythemia, and asphyxia. The admission examination results included WBC, red blood cell (RBC), hemoglobin (Hb), platelet, C-reactive protein, albumin, blood glucose |
| **Pledger** | 1982 | Retrospective study | Jaundiced, low birthweight neonates |  | UK | 39052 | Kernicterus | 10-year review period | 0.04 | Serum bilirubin (peak), albumin-binding capacity |  |
| Ritter | 1982 | Prospective study | Infants with birth weigh < 1500g with postnatal age < 24 hours, appropriate weight, respiratory distress requiring oxygen or mechanical ventilation, negative direct Coombs test and informed consent from parents | Not stated | US | 91 | Kernicterus | Not stated | 7.70 | Total bilirubin (peak), free bilirubin and serum albumin | HMD, IVH, sepsis, hyopglycaemia (descriptive analysis) |
| Unal | 2010 | Prospective study | Term and near term infants treated in the NICU with total bilirubin level over 25mg/dl | Not stated | Turkey | 30 | Bilirubin encephalopathy (value of BAER as reliable test for neurologic outcome) | 3 years follow up period | 16.70 | Total bilirubin > 25 mg/dl (not stated peak or admission) | ABO incompatability, low birth weight, G6PD deficiency, breast milk jaundice, cephalohaematoma (descriptive only) |
| Vandborg | 2012 | Controlled descriptive follow-up cohort study | All live-born infants in Denmark from 2004 to 2007 with a gestational age >35 weeks and severe hyperbilirubinemia in the neonatal period, defined as at least 1 measure of total serum bilirubin level >25 mg/dL during the first 3 weeks of life. | Infants with intermediate or advanced acute bilirubin encephalopathy, rhesus isoimmunization, and conjugated hyperbilirubinemia | Denmark | 414 | Developmental delay | Age 1-5 years | 55 | Total serum bilirubin (peak) | Gender, age, GA |
| Vandborg | 2015 | Nested double-cohort study | 167 exposed children born in Denmark 2000 to 2005 at gestational age ≥35 weeks with a total serum bilirubin ≥450 micromol/L (26.3mg/dL) and 163 age-, sex-, and gestational age-matched unexposed children | Not stated | Denmark | 330 (167 exposed, 163 unexposed) | Long-term sequelae, with impairment of motor development, executive function, or hearing | At age 5-10 years old, mean age of 7.7 |  | Total serum bilirubin > 450 µmol/L (peak) | Sex, age, GA |
| Weng | 2011 | Retrospective cohort study | Neonates admitted to the NICU from 1995 to 2007 with peak total serum bilirubin value > 20 mg/dl | Cholestasis (biliary atresia, hepatitis), gestational age < 34 weeks | Taiwan | 288 | Adverse outcomes of hyperbilirubinemia (mortality, kernicterus) | NICU stay | 6.25 | Clinical, etiologic and laboratory factors which potentiate adverse outcomes of hyperbilirubinemia, including TSB | Positive Coombs, anaemia, sepsis, GI obstructon, hemolysis (Rh, ABO, G6PD, spherocytosis) |
| **Zhang** | 2005 | Prospective cohort study | Full term neonates with total serum bilirubin > 205 mmol/L between January 2003 and December 2004 |  | China | 106 (56 cases, 50 controls) | Bilirubin encephalopathy |  |  | Total serum bilirubin (not stated peak or admission) bilirubin/ albumin ratio |  |

# Appendix 4: Included and excluded studies

# Included studies

# 1. Amin SB, Ahlfors C, Orlando MS, Dalzell LE, Merle KS, Guillet R. Bilirubin and serial auditory brainstem responses in premature infants. Pediatrics. 2001;107(4):664-70.

# 2. Ardakani SB, Dana VG, Ziaee V, Ashtiani MT, Djavid GE, Alijani M. Bilirubin/Albumin Ratio for Predicting Acute Bilirubin-induced Neurologic Dysfunction. Iranian journal of pediatrics. 2011;21(1):28-32.

# 3. Arnolda G, Nwe HM, Trevisanuto D, Thin AA, Thein AA, Defechereux T, et al. Risk factors for acute bilirubin encephalopathy on admission to two Myanmar national paediatric hospitals. Maternal health, neonatology and perinatology. 2015;1:22.

# 4. Bao Y, Chen XY, Shi LP, Ma XL, Chen Z, Luo F, et al. Clinical features of 116 near term and term infants with acute bilirubin encephalopathy in Eastern China. Hong Kong Journal of Paediatrics. 2013;18(2):82-8.

# 5. Behjati-Ardakani S, Nikkhah A, Ashrafi MR, Sedaghat M. Association between total serum bilirubin level and manifestations of kernicterus. Acta medica Iranica. 2006;44(6):405-8.

# 6. Besli GE, Metin F, Aksit MA, Saltik S. Long-term Effects of Indirect Hyperbilirubinemia on Auditory and Neurological Functions in Term Newborns. Medeniyet medical journal. 2020;35(1):29-39.

# 7. Bozkurt Ö, Yücesoy E, Oğuz B, Akinel Ö, Palali MF, Ataş N. Severe neonatal hyperbilirubinemia in the southeast region of Turkey. Turkish journal of medical sciences. 2020;50(1):103-9.

# 8. Colak R, Alkan Ozdemir S, Celik K, Yangin Ergon E, Olukman O, Eras Z, et al. Effects of high serum bilirubin levels on neurodevelopmental outcome at postnatal 12 and 24 months. European journal of pediatrics. 2016;175(11):1683-4.

# 9. Diala UM, Wennberg RP, Abdulkadir I, Farouk ZL, Zabetta CDC, Omoyibo E, et al. Patterns of acute bilirubin encephalopathy in Nigeria: a multicenter pre-intervention study. Journal of perinatology : official journal of the California Perinatal Association. 2018;38(7):873-80.

# 10. Donneborg ML, Hansen BM, Vandborg PK, Rodrigo-Domingo M, Ebbesen F. Extreme neonatal hyperbilirubinemia and kernicterus spectrum disorder in Denmark during the years 2000-2015. Journal of perinatology : official journal of the California Perinatal Association. 2020;40(2):194-202.

# 11. Duman N, Ozkan H, Serbetcioglu B, Ogun B, Kumral A, Avci M. Long-term follow-up of otherwise healthy term infants with marked hyperbilirubinaemia: should the limits of exchange transfusion be changed in Turkey? Acta paediatrica. 2004;93(3):361-7.

# 12. Ebbesen F, Bjerre JV, Vandborg PK. Relation between serum bilirubin levels >/=450 mumol/L and bilirubin encephalopathy; a Danish population-based study. Acta paediatrica. 2012;101(4):384-9.

# 13. ElTatawy SS, Elmazzahy EA, El Shennawy AM, Madani HA, Abou Youssef H, Iskander IF. The spectrum of bilirubin neurotoxicity in term and near-term babies with hyperbilirubinemia: Does outcome improve with time? Early human development. 2019;140:104909.

# 14. Hameed NN, Na' Ma AM, Vilms R, Bhutani VK. Severe neonatal hyperbilirubinemia and adverse short-term consequences in Baghdad, Iraq. Neonatology. 2011;100(1):57-63.

# 15. Harris MC, Bernbaum JC, Polin JR, Zimmerman R, Polin RA. Developmental follow-up of breastfed term and near-term infants with marked hyperbilirubinemia. Pediatrics. 2001;107(5):1075-80.

# 16. Iskander I, Gamaleldin R, El Houchi S, El Shenawy A, Seoud I, El Gharbawi N, et al. Serum bilirubin and bilirubin/albumin ratio as predictors of bilirubin encephalopathy. Pediatrics. 2014;134(5):e1330-9.

# 17. Jangaard KA, Fell DB, Dodds L, Allen AC. Outcomes in a population of healthy term and near-term infants with serum bilirubin levels of >or=325 micromol/L (>or=19 mg/dL) who were born in Nova Scotia, Canada, between 1994 and 2000. Pediatrics. 2008;122(1):119-24.

# 18. Kang W, Yuan X, Zhang Y, Song J, Xu F, Liu D, et al. Early prediction of adverse outcomes in infants with acute bilirubin encephalopathy. Annals of clinical and translational neurology. 2020;7(7):1141-7.

# 19. Kumar M, Tripathi S, Singh SN, Anand V. Outcome of neonates with severe hyperbilirubinemia in a tertiary level neonatal unit of North India. Clinical Epidemiology and Global Health. 2016;4(2):51-6.

# 20. Morioka I, Nakamura H, Koda T, Sakai H, Kurokawa D, Yonetani M, et al. Serum unbound bilirubin as a predictor for clinical kernicterus in extremely low birth weight infants at a late age in the neonatal intensive care unit. Brain & development. 2015;37(8):753-7.

# 21. Murki S, Kumar P, Majumdar S, Marwaha N, Narang A. Risk factors for kernicterus in term babies with non-hemolytic jaundice. Indian pediatrics. 2001;38(7):757-62.

# 22. Nabavi SS, Behzad Moghadam MH, Arab Hosseini MH, Vaezi M, Rajabi R. Evaluation of auditory brainstem responses (ABR) in healthy term infants with elevated bilirubin levels requiring exchange transfusion. Journal of Zanjan University of Medical Sciences and Health Services. 2011;19(75).

# 23. Nakamura H, Yonetani M, Uetani Y, Funato M, Lee Y. Determination of serum unbound bilirubin for prediction of kernicterus in low birthweight infants. Acta paediatrica Japonica : Overseas edition. 1992;34(6):642-7.

# 24. Nasiri J, Ghazavi M, Pourmirzaei M, Pak A. The causes and risk factors in patients with kernicterus referred to the clinic of pediatric neurology during the years 2011 to 2016. Journal of Isfahan Medical School. 2018;36(485):712-6.

# 25. Newman TB, Klebanoff MA. Neonatal hyperbilirubinemia and long-term outcome: another look at the Collaborative Perinatal Project. Pediatrics. 1993;92(5):651-7.

# 26. Newman TB, Liljestrand P, Jeremy RJ, Ferriero DM, Wu YW, Hudes ES, et al. Outcomes among newborns with total serum bilirubin levels of 25 mg per deciliter or more. The New England journal of medicine. 2006;354(18):1889-900.

# 27. Ochigbo SO, Venn I, Anachuna K. Prevalence of bilirubin encephalopathy in calabar, south-south Nigeria: A five-year review study. Iranian Journal of Neonatology. 2016;7(1):9-12.

# 28. Ogunlesi TA, Ogunfowora OB. Predictors of acute bilirubin encephalopathy among Nigerian term babies with moderate-to-severe hyperbilirubinaemia. Journal of tropical pediatrics. 2011;57(2):80-6.

# 29. Oh W, Tyson JE, Fanaroff AA, Vohr BR, Perritt R, Stoll BJ, et al. Association between peak serum bilirubin and neurodevelopmental outcomes in extremely low birth weight infants. Pediatrics. 2003;112(4):773-9.

# 30. Pledger DR, Scott JM, Belfield A. Kernicterus at low levels of serum bilirubin: the impact of bilirubin albumin-binding capacity. A 10-year retrospective survey. Biology of the neonate. 1982;41(1-2):38-44.

# 31. Qu Y, Huang S, Fu X, Wang Y, Wu H. Nomogram for Acute Bilirubin Encephalopathy Risk in Newborns With Extreme Hyperbilirubinemia. Frontiers in neurology. 2020;11:592254.

# 32. Ritter DA, Kenny JD, Norton HJ, Rudolph AJ. A prospective study of free bilirubin and other risk factors in the development of kernicterus in premature infants. Pediatrics. 1982;69(3):260-6.

# 33. Unal S, Gurbuz F, Guven A, Kose G. Three years follow-up of term and near-term infants with extreme hyperbilirubinemia and predictive value of brain auditory evoke responses. Early human development. 2010;86:S88.

# 34. Vandborg PK, Hansen BM, Greisen G, Jepsen M, Ebbesen F. Follow-up of neonates with total serum bilirubin levels >/= 25 mg/dL: a Danish population-based study. Pediatrics. 2012;130(1):61-6.

# 35. Vandborg PK, Hansen BM, Greisen G, Mathiasen R, Kasper F, Ebbesen F. Follow-up of extreme neonatal hyperbilirubinaemia in 5- to 10-year-old children: a Danish population-based study. Developmental medicine and child neurology. 2015;57(4):378-84.

# 36. Weng YH, Chiu YW, Cheng SW, Hsieh MY. Risk assessment for adverse outcome in term and late preterm neonates with bilirubin values of 20 mg/dL or more. American journal of perinatology. 2011;28(5):405-12.

# 37. Zhang X, Zhang SH. Ratio of serum bilirubin total amount to plasma albumin in predicting bilirubin encephalopathy. Chinese Journal of Clinical Rehabilitation. 2005;9(31):181-3.

# Shortlisted but excluded articles

1. Hyperbilirubinemia in term newborn infants. The Canadian Paediatric Society. Canadian family physician Medecin de famille canadien 1999; 45: 2690-2, 5, 713-6.

2. Kernicterus in full-term infants--United States, 1994-1998. MMWR Morbidity and mortality weekly report 2001; 50(23): 491-4.

3. Prevention of acute bilirubin encephalopathy and kernicterus in newborns. Position Statement #3049. NANN Board of Directors, March 2010. Advances in neonatal care : official journal of the National Association of Neonatal Nurses 2010; 10(3): 112-8.

4. Ackerman BD, Dyer GY, Taylor PM. Decline in serum bilirubin concentration coincident with clinical onset of kernicterus. Pediatrics 1971; 48(4): 647-50.

5. Adhikari S, Venkataseshan S, Kumar P. Severe hyperbilirubinemia and exchange transfusion in inborn neonates in northern India-a root cause analysis. Journal of perinatal medicine 2015; 43.

6. Ahlfors CE. Predicting bilirubin neurotoxicity in jaundiced newborns. Current opinion in pediatrics 2010; 22(2): 129-33.

7. Ahlfors CE, Bhutani VK, Wong RJ, Stevenson DK. Bilirubin binding in jaundiced newborns: from bench to bedside? Pediatric research 2018; 84(4): 494-8.

8. Ahlfors CE, Herbsman O. Unbound bilirubin in a term newborn with kernicterus. Pediatrics 2003; 111(5 Pt 1): 1110-2.

9. Ahmad M, Rehman A, Adnan M, Surani MK. Acute bilirubin encephalopathy and its associated risk factors in a tertiary care hospital, Pakistan. Pak J Med Sci 2020; 36(6): 1189-92.

10. Ahmed H, Yukubu AM, Hendrickse RG. Neonatal jaundice in Zaria, Nigeria--a second prospective study. West African journal of medicine 1995; 14(1): 15-23.

11. Ahmed M, Mostafa S, Fisher G, Reynolds TM. Comparison between transcutaneous bilirubinometry and total serum bilirubin measurements in preterm infants <35 weeks gestation. Annals of clinical biochemistry 2010; 47(Pt 1): 72-7.

12. Akahira-Azuma M, Yonemoto N, Ganzorig B, et al. Validation of a transcutaneous bilirubin meter in Mongolian neonates: comparison with total serum bilirubin. BMC pediatrics 2013; 13: 151.

13. Al Omran A, Al Salam Z, Al-Abdi S. Neonatal readmission for indirect hyperbilirubinemia in al Ahsa, Saudi Arabia. Archives of disease in childhood 2014; 99: A452.

14. Alken J, Hakansson S, Ekeus C, Gustafson P, Norman M. Rates of Extreme Neonatal Hyperbilirubinemia and Kernicterus in Children and Adherence to National Guidelines for Screening, Diagnosis, and Treatment in Sweden. JAMA network open 2019; 2(3): e190858.

15. Al-Maaroof ZW, Abbas W, Al-Jamil AS. Rebound increase in bilirubin level with its risk factors after treatment by intensive phototherapy for neonatal hyperbilirubinemia. Indian Journal of Public Health Research and Development 2019; 10(2): 646-52.

16. Al-Naama LM, Al-Sadoon IA, Al-Naama MM. Neonatal jaundice and glucose-6-phosphate dehydrogenase deficiency in Basrah. Annals of tropical paediatrics 1987; 7(2): 134-8.

17. Al-Omran A, Al-Abdi S, Al-Salam Z. Readmission for neonatal hyperbilirubinemia in an area with a high prevalence of glucose-6-phosphate dehydrogenase deficiency: A hospital-based retrospective study. Journal of neonatal-perinatal medicine 2017; 10(2): 181-9.

18. AlOtaibi SF, Blaser S, MacGregor DL. Neurological complications of kernicterus. The Canadian journal of neurological sciences Le journal canadien des sciences neurologiques 2005; 32(3): 311-5.

19. Amin SB. Clinical assessment of bilirubin-induced neurotoxicity in premature infants. Seminars in perinatology 2004; 28(5): 340-7.

20. Amin SB. Bilirubin Binding Capacity in the Preterm Neonate. Clinics in perinatology 2016; 43(2): 241-57.

21. Amin SB, Charafeddine L, Guillet R. Transient bilirubin encephalopathy and apnea of prematurity in 28 to 32 weeks gestational age infants. Journal of perinatology : official journal of the California Perinatal Association 2005; 25(6): 386-90.

22. Amiri Z, Dashkhaneh F, Rostami T. Prevalence of swirling complications in newborns treated with hyperbilirubinemia. Iranian Journal of Blood and Cancer 2017; 9(3): 39.

23. Aprillia Z, Gayatri D, Waluyanti FT. Sensitivity, Specificity, and Accuracy of Kramer Examination of Neonatal Jaundice: Comparison with Total Bilirubin Serum. Comprehensive child and adolescent nursing 2017; 40(sup1): 88-94.

24. Asefa GG, Gebrewahid TG, Nuguse H, et al. Determinants of Neonatal Jaundice among Neonates Admitted to Neonatal Intensive Care Unit in Public General Hospitals of Central Zone, Tigray, Northern Ethiopia, 2019: a Case-Control Study. Biomed Res Int 2020; 2020: 4743974.

25. Babin JP, Martin C. Kernicterus. Revue de Pediatrie 1980; 16(6): 327-42.

26. Bakhru V, Dara R, Bakhru J, Choudhary S. Universal bilirubin screening: A new hope to limit exchange transfusion in severe hyperbilirubinemia. Vox Sanguinis 2018; 113: 285-6.

27. Barnes SL, Walck D, Wilhite T, et al. Multicenter performance evaluation of the RAPIDPoint® 405 Neonatal Bilirubin Method. Clinical chemistry 2011; 57(10): A51.

28. Barton M, Calonge N, Petitti DB, et al. Screening of infants for hyperbilirubinemia to prevent chronic bilirubin encephalopathy: US Preventive Services Task Force recommendation statement. Pediatrics 2009; 124(4): 1172-7.

29. Basheer HBH, Makhlouf MSH, El Halawany F, Fahmy N, Iskander I. Screening for neonatal jaundice in El Galaa Teaching Hospital: A Egyptian Maternity Hospital - Can the model be replicated? Journal of clinical neonatology 2017; 6(2): 128-33.

30. Bech LF, Donneborg ML, Lund AM, Ebbesen F. Extreme neonatal hyperbilirubinemia, acute bilirubin encephalopathy, and kernicterus spectrum disorder in children with galactosemia. Pediatric research 2018; 84(2): 228-32.

31. Beeby PJ. Management of jaundice at gestational age of less than 35 weeks. Journal of paediatrics and child health 2010; 46: 59.

32. Bernaldo AJ, Segre CA. Bilirubin dosage in cord blood: could it predict neonatal hyperbilirubinemia? Sao Paulo medical journal = Revista paulista de medicina 2004; 122(3): 99-103.

33. Bertini G, Dani C, Rubaltelli FF. Transcutaneous bilirubinometry in clinical practice. Italian journal of pediatrics 2003; 29(3): 180-4.

34. Bhardwaj HP, Narang A, Bhakoo ON. Evaluation of Minolta jaundicemeter and icterometer for assessment of neonatal jaundice. Indian pediatrics 1989; 26(2): 161-5.

35. Bhardwaj K, Locke T, Biringer A, et al. Newborn Bilirubin Screening for Preventing Severe Hyperbilirubinemia and Bilirubin Encephalopathy: A Rapid Review. Current pediatric reviews 2017; 13(1): 67-90.

36. Bhargava V, Tawfik D, Niebuhr B, Jain SK. Transcutaneous bilirubin estimation in extremely low birth weight infants receiving phototherapy: a prospective observational study. BMC pediatrics 2018; 18(1): 227.

37. Bhutani VK, Johnson L. Kernicterus in late preterm infants cared for as term healthy infants. Seminars in perinatology 2006; 30(2): 89-97.

38. Bhutani VK, Johnson L. Kernicterus in the 21st century: frequently asked questions. Journal of perinatology : official journal of the California Perinatal Association 2009; 29 Suppl 1: S20-4.

39. Bhutani VK, Johnson L, Sivieri EM. Predictive ability of a predischarge hour-specific serum bilirubin for subsequent significant hyperbilirubinemia in healthy term and near-term newborns. Pediatrics 1999; 103(1): 6-14.

40. Bhutani VK, Johnson LH. Urgent clinical need for accurate and precise bilirubin measurements in the United States to prevent kernicterus. Clinical chemistry 2004; 50(3): 477-80.

41. Bhutani VK, Wong R. Bilirubin-induced neurologic dysfunction (BIND). Seminars in fetal & neonatal medicine 2015; 20(1): 1.

42. Bhutta ZA, Yusuf K. Transcutaneous bilirubinometry in Pakistani newborns: a preliminary report. JPMA The Journal of the Pakistan Medical Association 1991; 41(7): 155-6.

43. Bjerre JV, Ebbesen F. [Incidence of kernicterus in newborn infants in Denmark]. Ugeskrift for laeger 2006; 168(7): 686-91.

44. Blackmon LR, Fanaroff AA, Raju TN. Research on prevention of bilirubin-induced brain injury and kernicterus: National Institute of Child Health and Human Development conference executive summary. 2003. Pediatrics 2004; 114(1): 229-33.

45. Blick KE, Williams CL. Effect of skin color on transcutaneous bilirubin measurements: Bili chek versus drager method. American Journal of Clinical Pathology 2011; 136(3): 470.

46. Brink P, Solomons R, Van Toorn R. Kernicterus in children attending Tygerberg Children Hospital: A retrospective case series. Developmental medicine and child neurology 2012; 54: 111-2.

47. Brits H, Adendorff J, Huisamen D, et al. The prevalence of neonatal jaundice and risk factors in healthy term neonates at National District Hospital in Bloemfontein. African journal of primary health care & family medicine 2018; 10(1): e1-e6.

48. Campistol J, Galvez H, Cazorla AG, Málaga I, Iriondo M, Cusí V. Neurological dysfunction induced by bilirrubin. Neurologia 2012; 27(4): 202-11.

49. Cashore WJ. Free bilirubin concentrations and bilirubin-binding affinity in term and preterm infants. The Journal of pediatrics 1980; 96(3 Pt 2): 521-7.

50. Cashore WJ, Oh W. Unbound bilirubin and kernicterus in low-birth-weight infants. Pediatrics 1982; 69(4): 481-5.

51. Chang PW, Newman TB, Maisels MJ. Update on Predicting Severe Hyperbilirubinemia and Bilirubin Neurotoxicity Risks in Neonates. Current pediatric reviews 2017; 13(3): 181-7.

52. Cherepnalkovski AP, Piperkova K, Pota L, Kocevska SP, Aluloska NN, Zdravevska N. Evaluation of neonatal hyperbilirubinemia at the University Pediatric Clinic in Skopje, Republic of Macedonia over the period of two years. Early human development 2010; 86: S138.

53. Chotigeat U, Sangruang P. Outcome of jaundice in term neonates, age <7 days. Breastfeeding Medicine 2009; 4(4): 242-3.

54. Christensen RD, Agarwal AM, George TI, Bhutani VK, Yaish HM. Acute neonatal bilirubin encephalopathy in the State of Utah 2009-2018. Blood cells, molecules & diseases 2018; 72: 10-3.

55. Chung LH, Shen SH. The reserve albumin binding capacity in serum of newborn infants with or without hyperbilirubinemia and its clinical implication. Using the HBABA method. Acta Paediatrica Sinica 1980; 21(3): 148-57.

56. Connolly AM, Volpe JJ. Clinical features of bilirubin encephalopathy. Clinics in perinatology 1990; 17(2): 371-9.

57. Da Silva DPC, Martins RHG. Analysis of transient otoacoustic emissions and brainstem evoked auditory potentials in neonates with hyperbilirubinemia. Brazilian Journal of Otorhinolaryngology 2009; 75(3): 381-6.

58. Demir N, Peker E, Aslan O, Ceylan N, Tuncer O. Assessing of term newborns hospitalized in our neonatal unit with the diagnosis of indirect hyperbilirubinemia. Anatolian Journal of Clinical Investigation 2015; 9(2): 66-9.

59. Dhaded SM, Kumar P, Narang A. Safe bilirubin level for term babies with non-hemolytic jaundice. Indian pediatrics 1996; 33(12): 1059-60.

60. El-Honi NS, El-Mehabresh MS, Shlmani MA, Mersal AY. Bilirubin encephalopathy (kernicterus) among full term Libyan infants. Intensive Care Medicine 2013; 39: S124.

61. Falcao AS, Silva RF, Fernandes A, Brito MA, Brites D. Influence of hypoxia and ischemia preconditioning on bilirubin damage to astrocytes. Brain research 2007; 1149: 191-9.

62. Farouk ZL, Muhammed A, Gambo S, Mukhtar-Yola M, Umar Abdullahi S, Slusher TM. Follow-up of Children with Kernicterus in Kano, Nigeria. Journal of tropical pediatrics 2018; 64(3): 176-82.

63. Funato M, Teraoka S, Tamai H, Shimida S. Follow-up study of auditory brainstem responses in hyperbilirubinemic newborns treated with exchange transfusion. Acta paediatrica Japonica : Overseas edition 1996; 38(1): 17-21.

64. Gamaleldin R, Iskander I, Seoud I, et al. Risk factors for neurotoxicity in newborns with severe neonatal hyperbilirubinemia. Pediatrics 2011; 128(4): e925-31.

65. Gartner LM, Snyder RN, Chabon RS, Bernstein J. Kernicterus: high incidence in premature infants with low serum bilirubin concentrations. Pediatrics 1970; 45(6): 906-17.

66. Gkoltsiou K, Tzoufi M, Counsell S, Rutherford M, Cowan F. Serial brain MRI and ultrasound findings: relation to gestational age, bilirubin level, neonatal neurologic status and neurodevelopmental outcome in infants at risk of kernicterus. Early human development 2008; 84(12): 829-38.

67. Gong S, Schultz L, Sandhaus LM, Schmotzer CL. Assessment of neonatal hyperbilirubinemia using GEM premier 4000 total bilirubin assay. Clinical chemistry 2011; 57(10): A139.

68. Groves F, Slusher T, Radmacher P, Ofovwe G, Amuabunosi E, Owa J. Comparison of bilirubin-induced neurologic dysfunction (BIND) scores in jaundiced nigerian infants by resident & consultant pediatricians. American Journal of Epidemiology 2012; 175: S34.

69. Gunaseelan S, Devadas S, Pai N. Correlation of transcutaneous bilirubin and serum bilirubin concentration in term and late preterm newborns. Journal of clinical neonatology 2017; 6(3): 154-8.

70. Guo X, Pu X, An T, et al. Characteristics of brainstem auditory evoked potential of neonates with mild or moderate hyperbilirubinemia. Neural Regeneration Research 2007; 2(11): 660-4.

71. Gupta AK, Raj H, Anand NK. Auditory brainstem responses (ABR) in neonates with hyperbilirubinemia. Indian journal of pediatrics 1990; 57(5): 705-11.

72. Gustafson PA, Boyle DW. Bilirubin index: a new standard for intervention? Medical hypotheses 1995; 45(5): 409-16.

73. Hakan N, Aydin M, Caliskanozturk E, Zenciroglu A, Dursun A, Okumus N. Epidemiological and clinical features of the newborn infants with indirect hyperbilirubinemia. Early human development 2010; 86: S137.

74. Harris RC, Lucey JF, Maclean JR. Kernicterus in premature infants associated with low concentrations of bilirubin in the plasma. Pediatrics 1958; 21(6): 875-84.

75. Hasani M, Ghiasi A, Kheirkhah M, et al. Predictive value of transcutaneous bilirubinometry on third day of birth in diagnosis of hyperbilirubinemia in term and near-term neonates. Koomesh 2019; 21(1): 19-24.

76. Hernández CHM, Schmidt CMI, Huete LI. Kernicterus (bilirubin encephalopathy): Case reports. Revista Chilena de Pediatria 2013; 84(6): 659-66.

77. Hervei S, Bodanszky H, Miriszlai E, Csapo S. Hearing and vestibular functions after neonatal hyperbilirubinaemia. Monatsschrift fur Kinderheilkunde 1977; 125(3): 168-70.

78. Hulzebos CV, Dijk PH, van Imhoff DE, et al. The bilirubin albumin ratio in the management of hyperbilirubinemia in preterm infants to improve neurodevelopmental outcome: a randomized controlled trial--BARTrial. PloS one 2014; 9(6): e99466.

79. Hulzebos CV, van Imhoff DE, Bos AF, Ahlfors CE, Verkade HJ, Dijk PH. Usefulness of the bilirubin/albumin ratio for predicting bilirubin-induced neurotoxicity in premature infants. Archives of disease in childhood Fetal and neonatal edition 2008; 93(5): F384-8.

80. Hung KL. Auditory brainstem responses in patients with neonatal hyperbilirubinemia and bilirubin encephalopathy. Brain & development 1989; 11(5): 297-301.

81. Ipek IO, Bozaykut A. Clinically significant neonatal hyperbilirubinemia: An analysis of 646 cases in Istanbul. Journal of tropical pediatrics 2008; 54(3): 211-3.

82. Janjindamai W, Tansantiwong T. Accuracy of transcutaneous bilirubinometer estimates using BiliCheck in Thai neonates. Journal of the Medical Association of Thailand = Chotmaihet thangphaet 2005; 88(2): 187-90.

83. Jasso Gutierrez L, Salinas Vieyra JA. [Kernicterus. Anatomo clinical correlation in 64 newborn infants]. Boletin medico del Hospital Infantil de Mexico 1976; 33(5): 1133-41.

84. Kaplan M, Hammerman C. Prognostic value of direct bilirubin in neonatal hyperbilirubinemia. Indian journal of pediatrics 2008; 75(2): 193.

85. Kaplan M, Hammerman C, Newman TB, Liljestrand P, Escobar GJ. Infants with Bilirubin Levels of 30 mg/dL or More [8] (multiple letters). Pediatrics 2004; 113(2): 429-30.

86. Keenan WJ, Perlstein PH, Light IJ, Sutherland JM. Kernicterus in small sick premature infants receiving phototherapy. Pediatrics 1972; 49(5): 652-5.

87. Kim MH, Ja-Yoon J, Sher J, Brown AK. Lack of predictive indices in kernicterus: A comparison of clinical and pathologic factors in infants with or without kernicterus. Pediatrics 1980; 66(6): 852-8.

88. Kuzniewicz MW, Wickremasinghe AC, Wu YW, et al. Incidence, etiology, and outcomes of hazardous hyperbilirubinemia in newborns. Pediatrics 2014; 134(3): 504-9.

89. Lee YK, Daito Y, Katayama Y, Minami H, Negishi H. The significance of measurement of serum unbound bilirubin concentrations in high-risk infants. Pediatrics international : official journal of the Japan Pediatric Society 2009; 51(6): 795-9.

90. Mabogunje CA, Emokpae AA, Olusanya BO. Predictors of Repeat Exchange Transfusion for Severe Neonatal Hyperbilirubinemia. Pediatric critical care medicine : a journal of the Society of Critical Care Medicine and the World Federation of Pediatric Intensive and Critical Care Societies 2016; 17(3): 231-5.

91. Maisels MJ, Newman TB. Kernicterus in otherwise healthy, breast-fed term newborns. Pediatrics 1995; 96(4 Pt 1): 730-3.

92. Malla T, Singh S, Poudyal P, Sathian B, Bk G, Malla KK. A Prospective Study on Exchange Transfusion in Neonatal Unconjugated Hyperbilirubinemia--in a Tertiary Care Hospital, Nepal. Kathmandu University medical journal (KUMJ) 2015; 13(50): 102-8.

93. Manning D, Todd P, Maxwell M, Jane Platt M. Prospective surveillance study of severe hyperbilirubinaemia in the newborn in the UK and Ireland. Archives of disease in childhood Fetal and neonatal edition 2007; 92(5): F342-6.

94. Masarone M, Grasselli A, Fedrizzi E. Long term study of a group of 47 children who had undergone exchange transfusion for the treatment of physiological jaundice of the newborn. Acta Paediatrica Latina 1973; 26(2): 145-59.

95. Mayer I, Gursoy T, Hayran M, Ercin S, Ovali F. Value of twelfth hour bilirubin level in predicting significant hyperbilirubinemia in preterm infants. Journal of clinical medicine research 2014; 6(3): 190-6.

96. Mazahy MM, Elkhalegy HA, Emran TM, Abdelhady RA. Value of first-day serum bilirubin measurement in predicting the development of neonatal hyperbilirubinemia. Trends in Medical Research 2014; 9(2): 98-106.

97. McGillivray A, Polverino J, Badawi N, Evans N. Prospective Surveillance of Extreme Neonatal Hyperbilirubinemia in Australia. The Journal of pediatrics 2016; 168: 82-7.e3.

98. McGillivray AJ, Polverino J, Badawi N, Evans N. Long-term neurodevelopmental outcomes following extreme neonatal hyperbilirubinaemia in Australian infants born between 2010 and 2013. Journal of paediatrics and child health 2018; 54: 91.

99. Moiz B, Nasir A, Khan SA, Kherani SA, Qadir M. Neonatal hyperbilirubinemia in infants with G6PD c.563C > T Variant. BMC pediatrics 2012; 12: 126.

100. Mukhopadhyay K, Chowdhary G, Singh P, Kumar P, Narang A. Neurodevelopmental outcome of acute bilirubin encephalopathy. Journal of tropical pediatrics 2010; 56(5): 333-6.

101. Nahar N, Mannan MA, Dey AC, et al. Comparison of Serum Bilirubin with Transcutaneous Bilirubinometry in Late Preterm and Term Newborn. Mymensingh medical journal : MMJ 2017; 26(3): 621-7.

102. Newman TB, Kuzniewicz MW. Follow-up of extreme neonatal hyperbilirubinaemia: More reassuring results from Denmark. Developmental medicine and child neurology 2015; 57(4): 314-5.

103. Newman TB, Liljestrand P, Escobar GJ. Infants with bilirubin levels of 30 mg/dL or more in a large managed care organization. Pediatrics 2003; 111(6 Pt 1): 1303-11.

104. Newman TB, Xiong B, Gonzales VM, Escobar GJ. Prediction and prevention of extreme neonatal hyperbilirubinemia in a mature health maintenance organization. Archives of pediatrics & adolescent medicine 2000; 154(11): 1140-7.

105. Odutolu Y, Emmerson A. Low bilirubin kernicterus with sepsis and hypoalbuminaemia. BMJ case reports 2013.

106. Ogunlesi TA, Dedeke IO, Adekanmbi AF, Fetuga MB, Ogunfowora OB. The incidence and outcome of bilirubin encephalopathy in Nigeria: a bi-centre study. Nigerian journal of medicine : journal of the National Association of Resident Doctors of Nigeria 2007; 16(4): 354-9.

107. Ogunlesi TA, Ogunlesi FB. Family socio-demographic factors and maternal obstetric factors influencing appropriate health-care seeking behaviours for newborn jaundice in Sagamu, Nigeria. Maternal and child health journal 2012; 16(3): 677-84.

108. Oktay R, Satar M, Atici A. The risk of bilirubin encephalopathy in neonatal hyperbilirubinemia. The Turkish journal of pediatrics 1996; 38(2): 199-204.

109. Okumura A, Ichimura S, Hayakawa M, et al. Neonatal Jaundice in Preterm Infants with Bilirubin Encephalopathy. Neonatology 2021: 1-9.

110. Okumura A, Kidokoro H, Shoji H, et al. Kernicterus in preterm infants. Pediatrics 2009; 123(6): e1052-8.

111. Okumura A, Kitai Y, Arai H. Magnetic resonance imaging abnormalities during the neonatal period in preterm infants with bilirubin encephalopathy. Pediatrics and neonatology 2021.

112. Okumura A, Kitai Y, Arai H, et al. Auditory brainstem response in preterm infants with bilirubin encephalopathy. Early human development 2021; 154: 105319.

113. Olusanya BO, Mabogunje CA, Imam ZO, Emokpae AA. Severe neonatal hyperbilirubinaemia is frequently associated with long hospitalisation for emergency care in Nigeria. Acta paediatrica 2017; 106(12): 2031-7.

114. Oygur N, Nuzumlali D, Ersay A, Velipasaoglu S, Yegin O. Bilirubin toxicity: Outcome in infants with high bilirubin levels [1]. European journal of pediatrics 1996; 155(2): 145-6.

115. Paul SS, Thomas V, Singh D. Outcome of neonatal hyperbilirubinemia managed with exchange transfusion. Indian pediatrics 1988; 25(8): 765-9.

116. Pays M, Beljean M. Microdetermination of unbound bilirubin. Application to the prevention of kernicterus by estimation of the serum bilirubin binding capacity in neonatal hyperbilirubinemia. Zeitschrift fur klinische Chemie und klinische Biochemie 1974; 12(5): 250-1.

117. Ploussard JP, Foliot A, Christoforov B, Etienne JP, Housset E. Contribution to the study of criteria of evaluation of the kernicterus risk in the newborn (experimental study in Gunn rats). Archives francaises de pediatrie 1971; 28(8): 797-816.

118. Polacek K. Risk of kernicterus in newborn infants with a high level of conjugated bilirubin. Acta paediatrica Scandinavica 1966; 55(4): 401-4.

119. Punnoose AR, Schwartz LA, Golub RM. Neonatal hyperbilirubinemia. JAMA - Journal of the American Medical Association 2012; 307(19): 2115.

120. Rastogi D, Rastogi S. Neonatal hyperbilirubinemia in healthy breast-fed newborn: Assessment at discharge. Emergency and Office Pediatrics 1999; 12(3): 100-2.

121. Rasul CH, Hasan MA, Yasmin F. Outcome of neonatal hyperbilirubinemia in a tertiary care hospital in bangladesh. The Malaysian journal of medical sciences : MJMS 2010; 17(2): 40-4.

122. Rhine WD, Benitz WE, Dennery PA, Stevenson DK, Seidman DS. Bilirubin measurements and long-term neurologic outcome. Pediatrics 1994; 94(2 Pt 1): 246.

123. Robertson AF, Karp WB, Brodersen R. Comparison of the bilirubin concentration and the bilirubin/albumin ratio with the bilirubin-binding ability in neonatal serum. Journal of Pediatrics 1998; 132(2): 343-4.

124. Romagnoli C, Tiberi E, Barone G, et al. Development and validation of serum bilirubin nomogram to predict the absence of risk for severe hyperbilirubinaemia before discharge: a prospective, multicenter study. Italian journal of pediatrics 2012; 38: 6.

125. Salas AA, Mazzi E. Exchange transfusion in infants with extreme hyperbilirubinemia: an experience from a developing country. Acta paediatrica 2008; 97(6): 754-8.

126. Sankaran K. Hyperbilirubinemia in newborns with gestation >35 weeks. Chinese Journal of Contemporary Pediatrics 2010; 12(10): 761-5.

127. Sanpavat S. Exchange transfusion and its morbidity in ten-year period at King Chulalongkorn Hospital. Journal of the Medical Association of Thailand 2005; 88(5): 588-92.

128. Sanpavat S, Nuchprayoon I, Smathakanee C, Hansuebsai R. Nomogram for prediction of the risk of neonatal hyperbilirubinemia, using transcutaneous bilirubin. Journal of the Medical Association of Thailand = Chotmaihet thangphaet 2005; 88(9): 1187-93.

129. Schwoebel A, Gennaro S. Neonatal hyperbilirubinemia. The Journal of perinatal & neonatal nursing 2006; 20(1): 103-7.

130. Sgro M, Campbell D, Barozzino T, Shah V. Acute neurological findings in a national cohort of neonates with severe neonatal hyperbilirubinemia. Journal of perinatology : official journal of the California Perinatal Association 2011; 31(6): 392-6.

131. Sgro M, Campbell DM, Kandasamy S, Shah V. Incidence of chronic bilirubin encephalopathy in Canada, 2007-2008. Pediatrics 2012; 130(4): e886-90.

132. Sgro M, Kandasamy S, Campbell DM, Ofner M. Comparing rate of severe neonatal hyperbilirubinemia in three Western industrialized populations: Canada, the United Kingdom & Ireland, and Switzerland. Paediatrics and Child Health (Canada) 2014; 19(6): e92-e3.

133. Shapiro SM. Definition of the clinical spectrum of kernicterus and bilirubin-induced neurologic dysfunction (BIND). Journal of perinatology : official journal of the California Perinatal Association 2005; 25(1): 54-9.

134. Shapiro SM, Powers KM. Kernicterus subtypes and their association with signs of neonatal encephalopathy. Annals of Neurology 2010; 68: S117-S8.

135. Sharma D, Harish R, Bhatti A, Uppal R, Naseem J. Early Neurodevelopmental Outcome of Neonates with Gestation 35 Weeks or More with Serum Bilirubin in Exchange Range Without Encephalopathy: A Prospective Observational Study. Neonatal network : NN 2021; 40(2): 66-72.

136. Sharma R, Grover N, Sankhyan N, Sharma ML. Auditory brainstem responses in neonatal hyperbilirubinemia and effect of therapy. Indian journal of otolaryngology and head and neck surgery : official publication of the Association of Otolaryngologists of India 2006; 58(4): 340-2.

137. Shnier MH, Levin SE. Hyperbilirubinaemia and kernicterus in premature and full-term Bantu newborn infants. British medical journal 1959; 1(5128): 1004-7.

138. Slusher TM, Angyo IA, Bode-Thomas F, et al. Transcutaneous bilirubin measurements and serum total bilirubin levels in indigenous African infants. Pediatrics 2004; 113(6): 1636-41.

139. Smith CM, Barnes GP, Jacobson CA, Oelberg DG. Auditory brainstem response detects early bilirubin neurotoxicity at low indirect bilirubin values. Journal of perinatology : official journal of the California Perinatal Association 2004; 24(11): 730-2.

140. Subspecialty Group of N, Society of Pediatrics CMA, Chinese Multicenter S, Coordination Group for Neonatal Bilirubin E. [Clinical characteristics of bilirubin encephalopathy in Chinese newborn infants-a national multicenter survey]. Zhonghua er ke za zhi Chinese journal of pediatrics 2012; 50(5): 331-5.

141. Tabb PA, Savage DC, Inglis J, Walker CH. Controlled trial of phototherapy of limited duration in the treatment of physiological hyperbilirubinaemia in low-birth-weight infants. Lancet (London, England) 1972; 2(7789): 1211-2.

142. Tay JS, Low PS, Wong HB, Yip WC. Value and limitations of bilirubin binding capacity in predicting the development of kernicterus. Australian paediatric journal 1984; 20(1): 63-6.

143. Tayyab S, Qasim MA. Bilirubin-albumin binding: An approach towards prevention of kernicterus in infants. Medical Science Research 1988; 16(17): 893-5.

144. Thoma J, Gerull G, Mrowinski D. A long-term study of hearing in children following neonatal hyperbilirubinemia. Archives of oto-rhino-laryngology 1986; 243(2): 133-7.

145. Tiker F, Gulcan H, Kilicdag H, Tarcan A, Gurakan B. Extreme hyperbilirubinemia in newborn infants. Clinical pediatrics 2006; 45(3): 257-61.

146. Trikalinos TA, Chung M, Lau J, Ip S. Systematic review of screening for bilirubin encephalopathy in neonates. Pediatrics 2009; 124(4): 1162-71.

147. Usman F. Comparison of bilirubin induced neurologic dysfunction score with brainstem evoked auditory response in detecting acute bilirubin encephalopathy in term neonates in aminu kano teaching hospital, nigeria. Journal of perinatal medicine 2017; 45: 256.

148. van Toorn R, Brink P, Smith J, Ackermann C, Solomons R. Bilirubin-Induced Neurological Dysfunction: A Clinico-Radiological-Neurophysiological Correlation in 30 Consecutive Children. Journal of child neurology 2016; 31(14): 1579-83.

149. Watchko JF. Recurrence of kernicterus in term and near-term infants in Denmark [1]. Acta Paediatrica, International Journal of Paediatrics 2001; 90(9): 1080.

150. Watchko JF, Claassen D. Kernicterus in premature infants: current prevalence and relationship to NICHD Phototherapy Study exchange criteria. Pediatrics 1994; 93(6 Pt 1): 996-9.

151. Watchko JF, Spitzer AR, Clark RH. Prevalence of Hypoalbuminemia and Elevated Bilirubin/Albumin Ratios in a Large Cohort of Infants in the Neonatal Intensive Care Unit. The Journal of pediatrics 2017; 188: 280-6.e4.

152. Waters WJ. The prevention of bilirubin encephalopathy. The Journal of pediatrics 1958; 52(5): 559-65.

153. Weng YH, Chiu YW. Spectrum and outcome analysis of marked neonatal hyperbilirubinemia with blood group incompatibility. Chang Gung medical journal 2009; 32(4): 400-8.

154. Wible KL. Bilirubin, albumin, and the risk of kernicterus. The Journal of pediatrics 1980; 97(6): 1038.

155. Wolf MJ, Beunen G, Casaer P, Wolf B. Neurological status in severely jaundiced Zimbabwean neonates. Journal of tropical pediatrics 1998; 44(3): 161-4.

156. Wouda EMN, Thielemans L, Ngerseng T, et al. Clinical and neurodevelopmental outcome of newborns with excessively high levels of serum bilirubin in a limitedresource setting: A matched case-control study. Tropical Medicine and International Health 2017; 22: 309-10.

157. Wu YW, Kuzniewicz MW, Wickremasinghe AC, et al. Risk for cerebral palsy in infants with total serum bilirubin levels at or above the exchange transfusion threshold: a population-based study. JAMA pediatrics 2015; 169(3): 239-46.

158. Wusthoff CJ, Loe IM. Impact of bilirubin-induced neurologic dysfunction on neurodevelopmental outcomes. Seminars in fetal & neonatal medicine 2015; 20(1): 52-7.

159. Yeung CY. Kernicterus in term infants. Australian paediatric journal 1985; 21(4): 273-4.

160. Yu C, Li H, Zhang Q, He H, Chen X, Hua Z. Report about term infants with severe hyperbilirubinemia undergoing exchange transfusion in Southwestern China during an 11-year period, from 2001 to 2011. PloS one 2017; 12(6): e0179550.

161. Yu ZB, Dong XY, Han SP, et al. Transcutaneous bilirubin nomogram for predicting neonatal hyperbilirubinemia in healthy term and late-preterm Chinese infants. European journal of pediatrics 2011; 170(2): 185-91.

162. Zamet P, Nakamura H, Perez Robles S. The use of critical levels of birth weight and 'free bilirubin' as an approach for prevention of kernicterus. Biology of the Neonate - Foetal and Neonatal Research 1975; 26(3-4): 274-82.

163. Zamet P, Nakamura H, Perez Robles S, Larroche Cl J. Determination of unbound bilirubin and the prevention of kernicterus. Birth Defects: Original Article Series 1976; No. 380: 236-44.

**Appendix 5: full report of effect estimates**

### Analysis 1. Association between total serum bilirubin value with KSD and sensorineural hearing loss (adjusted Odds Ratio per unit rise in TSB)

**1.1 Association between TSB and KSD**

Seven studies contributed data to this analysis, of which five studies enrolled high-risk infants, one enrolled infants already diagnosed with ABE (with further adverse effects relating to KSD as the outcome evaluated) and one general newborn population. Because of the very high degree of heterogeneity when data from all studies were pooled (I square of 92%), contributed mainly by the difference in the direction of results between studies that enrolled high-risk infants and the other studies, we decided to report pooled analysis only at the subgroup level.

Among high-risk infants, meta-analysis shows a positive association between TSB and KSD or related complications (pooled aOR 1.10, 95% CI 1.07 to 1.13; participants = 4484; studies = 5) (moderate-certainty evidence), but there is no clear association between TSB and KSD in general neonatal population (pooled aOR 1.10, 95% CI 0.98 to 1.23; participants = 34533; studies = 1) (moderate-certainty evidence, downgraded one level for study limitation). There is no clear association between the diagnosis of ABE and further adverse outcomes such as cerebral palsy and developmental problems (pooled aOR 0.99, 95% CI 0.97 to 1.01; participants = 76; studies = 1) (low-certainty evidence, downgraded one level each for study limitation and imprecision) (*Figure 4*).

Among studies with high-risk infants, different studies evaluated different risk factors, including infants in high-prevalent setting1, ELBW infants2 or preterm and late-preterm infants3, and infants admitted with high TSB, defined by a TSB cut-off value of 25 mg/dl3,4 and a TSB value that included all cases of kernicterus in the study, namely 18 mg/dl5. In [Murki 2001](#STD-Murki-2001)5, 21.4% of infants with kernicterus had asphyxia. Within this subgroup of studies, there was overall high heterogeneity, as evident by an I2 of 87%. The heterogeneity was contributed solely by [Qu 2020](#STD-Qu-2020)3, as removal of this study reduces to I square to 0%. We explored plausible explanation that might have contributed to the heterogeneity, and identified a plausible explanation, as follows: [Qu 2020](#STD-Qu-2020)3 has the same direction of effects but greater effect sizes (stronger positive association) compared to the other studies, possibly because the entire population enrolled in this study had two major risk factors (namely, high TSB on admission (with a higher cut-off than other studies with similar criteria) and prematurity), as opposed to the population in the other studies, all of whom had only one major risk factor in the entire population enrolled, as detailed above. The authors team decided to pool this study with others having found a plausible explanation with the same category of risk factors as that identified in other studies in this subgroup. However, the high degree of heterogeneity has resulted in one level of downgrade in certainty of evidence rating (*Appendix 6*).

*[Weng 2011](#STD-Weng-2011)4 performed multivariate analysis in the form of logistic regression using strata of total serum bilirubin values above that of the normal range (< 25 mg/dL). We obtained raw data of the study from the authors and re-analysed the data using the value of total serum bilirubin values as a continuous covariate, and included our re-analysed adjusted Odds Ratio in the current meta-analysis.

**1.2 Association between TSB and sensorineural hearing loss**

There is a possible association between serum bilirubin and sensorineural hearing loss among high-risk infants (pooled aOR 1.14, 95% CI 1.00 to 1.30; participants = 2595; studies = 1) (moderate-certainty evidence, downgraded one level for imprecision) and among general neonatal population (pooled aOR 0.95, 95% CI 0.75 to 1.20; participants = 17260; studies = 1) (low-certainty evidence, downgraded one level each for study limitation and imprecision).

[Ogunlesi 2011](#STD-Ogunlesi-2011)6 reported "TSB at high-risk zone" as having significant association with ABE in bivariate analysis, but the significance was lost in multivariate analysis. However, the authors did not report the adjust Odds Ratio of TSB in high-risk zone in multivariate analysis to enable extraction and pooling of data. The authors reported that outborn (pooled aOR 9,7, 95% CI 1.125, 11.614), low social classes (pooled aOR 2.2 (95% CI 1.721, 10.345), severe anaemia (pooled aOR 11.6 (95% CI 5.942, 13.064) and acidosis (pooled aOR 8.2 (95% CI 4.395, 15.390) as independent predictors.

**Narrative synthesis**

There are 13 other studies that evaluated the association between TSB and KSD, but they did not contain data that were suitable to be extracted for meta-analysis. We summarised the results of these studies narratively, as follows: In a study involving two hospital sites in Myanmar, median TSB on admission was significantly higher in those with ABE versus those without in both sites (694 vs 291 µmol/L (40.6 vs 17.1 mg/dl) at Hospital A, and 496 vs 287 µmol/L (29.0 vs 16.8 mg/dl) at hospital B)7. However, two other studies reported a wide range of TSB in infants with kernicterus8,9.Another study in Japan reported that 44% of the enrolled infants < 30 weeks gestational with kernicterus had peak TSB below 15mg/dL (256 µmol/L)10. Although one study reported a positive correlation between TSB and lower PDI and MDI scores using Spearman's correlation11, six other studies found that TSB levels on its own does not correlate well with the risk of developing KSD and related adverse outcomes12-17.Various threshold levels of TSB for urgent treatment were proposed, including 600 µmol/L (35.1 mg/dl) in studies from Denmark where incidence of KSD is low18,19, and lower levels in studies with higher incidence of KSD, such as 494 µmol/L (28.9 mg/dl) and 530 µmol/L (31 mg/dl) for high and low-risk infants respectively in a study from Egypt14, and 382 µmol/L (22.4 mg/dl) and 477 µmol/L (27.9 mg/dl) in high and low-risk infants respectively in a study in Iran8. Overall, apart from the findings that neonates with very high bilirubin levels were at higher risk of adverse outcomes than those with low levels, these studies showed no clear and consistent associations between the range of TSB levels and the risk of KSD.

### Analysis 2 Association between hyperbilirubinaemia status and KSD or developmental problems (adjusted Odds Ratio for infants with hyperbilirubinaemia versus those without)

**2.1 Association between hyperbilirubinaemia and cerebral palsy or other neurological diagnosis**

Meta-analysis of two studies shows no clear association between hyperbilirubinaemia and cerebral palsy or other neurological diagnosis (pooled aOR 1.00, 95% CI 0.51 to 1.95; participants = 56578; studies = 2) (moderate-certainty evidence, downgraded one level for imprecision) (*Figure 5*).

**2.2 Association between hyperbilirubinaemia and developmental delay or abnormal neurological examination in the long term**

Meta-analysis of two studies shows no clear association between hyperbilirubinaemia and developmental delay or abnormal neurological examination in the long term (pooled aOR 0.90, 95% CI 0.46 to 1.76; participants = 52837; studies = 2) (moderate-certainty evidence, downgraded one level for imprecision).

**2.3 Comparison between infants with and without hyperbilirubinaemia on the scores of developmental screening test (including IQ test and Ankara Inventory, combined using standardised mean difference)**

Meta-analysis of four studies shows no clear difference between infants with and without hyperbilirubinaemia on the scores of developmental screening test (SMD 0.02, 95% CI -0.12 to 0.17; participants = 632; studies = 4) (moderate-certainty evidence, downgraded one level for imprecision).

**2.4 Association between hyperbilirubinaemia and deafness**

From a single study that enrolled term and late-preterm infants, there is no clear association between hyperbilirubinaemia and deafness (pooled aOR 1.30, 95% CI 0.55 to 3.09; participants = 52588; studies = 1) (moderate-certainty evidence, downgraded one level for imprecision).

**2.5 Association between hyperbilirubinaemia and attention deficit disorder**

From a single study that enrolled term and late-preterm infants, there is a positive association between hyperbilirubinaemia and attention deficit disorder (pooled aOR 1.90, 95% CI 1.10 to 3.28; participants = 52588; studies = 1) (moderate-certainty evidence, downgraded one level for imprecision).

**2.6 Association between hyperbilirubinaemia and autistic spectrum disorder**

From a single study that enrolled term and late-preterm infants, there is a positive association between hyperbilirubinaemia and autistic spectrum disorder (pooled aOR 1.60, 95% CI 1.03 to 2.49; participants = 56019; studies = 1) (moderate-certainty evidence, downgraded one level for imprecision).

### Analysis 3 Comparison between infants with KSD and infants without: total serum bilirubin value (mg/dL)

In studies that enrolled preterm or LBW infants, there appeared to be no clear differences in total serum bilirubin between those diagnosed with KSD and those without (MD 1.40 mg/dl, 95% CI -0.42 to 3.23; participants = 294; studies = 3; I2 = 55%) (low-certainty evidence, downgraded one level each for study limitation and publication bias). However, among term and late-preterm infants, total serum bilirubin appeared higher in infants with KSD (MD 10.28, 95% CI 7.73 to 12.84; participants = 305; studies = 5; I2 = 44%) (moderate-certainty evidence, downgraded one level for publication bias). The single small study that enrolled a mixture of term and preterm infants showed no clear difference in serum bilirubin between the two groups (MD 2.10, 95% CI -0.09 to 4.29; participants = 28; studies = 1), although the certainty of evidence for this result was very low due to serious concerns on study limitations, imprecision and reporting or publication bias.

### Analysis 4 Association between demographic, clinical and laboratory factors with KSD (adjusted Odds Ratio of KSD for infants with the possible risk factor versus those without)

Among the included studies that evaluated the association of total serum bilirubin with KSD, we extracted data on other factors that were evaluated concurrently, including demographic, clinical and laboratory factors. We only extracted data from adjusted analysis. Following are the analysis results according to categories.

**Maternal/demographic factors**

4.1. Advanced maternal age

Based on a single study, a higher proportion of infants with advanced maternal age developed KSD (aOR 2.62, 95% CI 1.10 to 6.25, participants = 517; studies = 1) (moderate-certainty evidence, downgraded one level for imprecision).

4.2. Low maternal education

Based on two studies, there was no clear association between low maternal education and risk of KSD (aOR 0.89, 95% CI 0.59 to 1.35; participants = 3398; studies = 2) (moderate-certainty evidence, downgraded one level for imprecision).

4.3 Refugee status

Based on a single study, a higher proportion of infants with family status as a refugee developed KSD (aOR 6.84, 95% CI 1.81 to 25.83, participants = 115, study = 1) (moderate-certainty evidence, downgraded one level for imprecision).

4.4 Incomplete antenatal visits

Based on a single study, a higher proportion of infants whose mothers had incomplete antenatal visits developed KSD (aOR 2.3, 95% CI 1.2 to 4.4; participants = 1040; studies = 1) (low-certainty evidence, downgraded one level each for study limitation and imprecision).

4.5 Delay in receiving antenatal care

Based on a single study, a higher proportion of infants whose mothers had delayed antenatal care developed KSD (aOR 4.5, 95% CI 2.3 to 8.5; participants = 1040; studies = 1) (low-certainty evidence, downgraded one level each for study limitation and imprecision).

4.6 self-referral

Based on a single study, a higher proportion of infants whose mothers referred themselves for antenatal care developed KSD (aOR 2.63, 95% CI 1.16 to 5.99; participants = 582; studies = 1) (Moderate-certainty evidence, downgraded one level for imprecision).

4.7 Out-of-hospital birth

Based on three studies, a higher proportion of infants born out of hospital developed KSD (aOR 2.63, 95% CI 1.82 to 3.81; participants = 1774; studies = 3, I2=0%) (moderate-certainty evidence, downgraded one level for study limitation).

4.8 Early discharge

Based on a single study, there was no clear association between early discharge and risk of developing KSD (aOR 2.50, 95% CI 0.84 to 7.41; participants = 115; studies = 1) (moderate-certainty evidence, downgraded one level for imprecision).

**Clinical factors**

4.9 Prematurity or low birth weight (< 2.5 kg)

Based on two studies, there was a negative association between prematurity/low birth weight and risk of developing KSD (aOR 0.40, 95% CI 0.18 to 0.87; participants = 738; studies = 2) (low-certainty evidence, downgraded one level each for study limitation and imprecision).

4.10 Asphyxia

Based on a single study, a higher proportion of infants with asphyxia developed KSD (aOR 8.29, 95% CI 1.17 to 59.01; participants = 64; studies = 1) (low-certainty evidence, downgraded two levels for imprecision). We were unable to reproduce the effect estimate figures quoted by the study authors (aOR 8.29, 95% CI 1.17 to 111.8) in our analysis.

4.11 Gastrointestinal obstruction

Based on a single study, infants with gastrointestinal obstruction appeared more likely to develop KSD (aOR 39.23, 95% CI 2.71 to 567.32; participants = 288; studies = 1) (low-certainty evidence, downgraded two levels for marked imprecision).

4.12 Sepsis

As the three included studies that evaluated sepsis enrolled three distinctly different population groups with different risk factors, we decided to separate them into three subgroups, as follows:

i). Term and late-preterm infants with high TSB on admission: a single study in this subgroup analysis showed that markedly more infants in this cohort with concurrent sepsis developed KSD as compared to infants without sepsis (aOR 161.66, 95% CI 11.65 to 2243.01; participants = 288; studies = 1) (low-certainty evidence, downgraded two levels for marked imprecision).

ii). Term and late-preterm infants diagnosed with ABE: a single study in this subgroup analysis showed no clear difference between infants with and without concurrent sepsis in the likelihood of developing KSD (aOR 1.43, 95% CI 0.19 to 11.03; participants = 87; studies = 1) (very-low-certainty evidence, downgraded one level for study limitations and two levels for marked imprecision).

iii). ELBW infants: a single study in this subgroup analysis showed no clear difference between infants with and without sepsis in the likelihood of developing KSD (aOR 1.36, 95% CI 0.96 to 1.92; participants = 3246; studies = 1) (moderate-certainty evidence, downgraded one level for imprecision).

**Laboratory factors**

4.13 Acidosis

Based on a single study, there was a higher proportion of infants with acidosis who developed KSD (aOR 8.20, 95% CI 4.39 to 15.30; participants = 156; studies = 1) (very-low-certainty evidence, downgraded one level for study limitations and two levels for marked imprecision).

4.14 Rh incompatibility

Based on a single study, there was a higher proportion of infants with rhesus incompatibility who developed KSD (aOR 30.97, 95% CI 5.08 to 188.93; participants = 288; studies = 1) (low-certainty evidence, downgraded two levels for marked imprecision).

4.15 ABO incompatibility

Based on a single study, there was a higher proportion of infants with ABO incompatibility who developed KSD (aOR 5.12, 95% CI 1.33 to 19.67; participants = 288; studies = 1) (low-certainty evidence, downgraded two levels for marked imprecision).

4.16 G6PD Deficiency

Based on two studies, there was a higher proportion of infants with G6PD deficiency who developed KSD (aOR 5.84, 95% CI 2.01 to 16.96; participants = 403; studies = 2) (low-certainty evidence, downgraded two levels for marked imprecision).

4.17 Hereditary spherocytosis

Based on a single study, there was a higher proportion of infants with hereditary spherocytosis who developed KSD (aOR 19.62, 95% CI 1.63 to 235.53; participants = 288; studies = 1) (low-certainty evidence, downgraded two levels for marked imprecision).

4.18 Hemolytic conditions not otherwise specified (Coomb's test positive)

Based on three studies, there was a higher proportion of infants who had positive Coomb's test (without specifying the diagnosis of haemolysis) who developed KSD (aOR 2.74, 95% CI 1.68 to 4.48; participants = 1443; studies = 3) (moderate-certainty evidence, downgraded one level for imprecision).

4.19 Anaemia

Based on two studies, there was a higher proportion of infants with anaemia who developed KSD (aOR 11.65, 95% CI 6.44 to 21.09; participants = 444; studies = 2) (low-certainty evidence, downgraded two levels for marked imprecision).

4.20 Abnormal white cell count

Based on a single study, there was a higher proportion of infants with abnormal white cell count who developed KSD (aOR 6.50, 95% CI 2.23 to 19.00; participants = 517; studies = 1) (very-low-certainty evidence, downgraded one level for indirectness and two levels for marked imprecision).

4.21 Hypoglycemia

Based on a single study, there was no clear association between hypoglycaemia and the likelihood of developing KSD (aOR 2.25, 95% CI 0.36 to 14.15; participants = 156; studies = 1) (very-low-certainty evidence, downgraded one level for indirectness and two levels for marked imprecision).

4.22 Serum albumin value

Based on a single study, there appeared to be an inverse association between serum albumin value and the likelihood of developing KSD (aOR 0.81, 95% CI 0.73 to 0.91; participants = 517; studies = 1) (moderate-certainty evidence, downgraded one level for imprecision).

**Narrative synthesis**

There are 11 other studies that reported the association between the other concurrent risk factors and KSD, evaluated in addition to the association between TSB and KSD, but they did not contain data that were suitable to be extracted for meta-analysis. We summarise the results of these studies narratively, as follows:

Among other factors associated with KSD, the most commonly reported were ABO incompatibility8,9,13,16,18,20,21, G6PD deficiency7,9,21, Rhesus incompatibility21 and a positive Coombs's test20, although evidence of haemolysis was not consistently documented in these studies. Septicaemia, defined variably, was a risk factor for KSD in five studies8-10,14,20. Other risk factors included lower admission/birth weight16,20, vaginal delivery20, respiratory distress and acidosis8 and inadequate establishment of breastfeeding16,22. Homebirth was not identified as a risk factor in two studies13,20. Amongst sick premature babies < 1500gm, prolonged hypothermia, acidosis or hypoxaemia, rather than peak TSB levels, were identified as risk factors of kernicterus23.

**References**

1. Diala UM, Wennberg RP, Abdulkadir I, et al. Patterns of acute bilirubin encephalopathy in Nigeria: a multicenter pre-intervention study. *Journal of perinatology : official journal of the California Perinatal Association.* 2018;38(7):873-880.

2. Oh W, Tyson JE, Fanaroff AA, et al. Association between peak serum bilirubin and neurodevelopmental outcomes in extremely low birth weight infants. *Pediatrics.* 2003;112(4):773-779.

3. Qu Y, Huang S, Fu X, Wang Y, Wu H. Nomogram for Acute Bilirubin Encephalopathy Risk in Newborns With Extreme Hyperbilirubinemia. *Frontiers in neurology.* 2020;11:592254.

4. Weng YH, Chiu YW, Cheng SW, Hsieh MY. Risk assessment for adverse outcome in term and late preterm neonates with bilirubin values of 20 mg/dL or more. *American journal of perinatology.* 2011;28(5):405-412.

5. Murki S, Kumar P, Majumdar S, Marwaha N, Narang A. Risk factors for kernicterus in term babies with non-hemolytic jaundice. *Indian pediatrics.* 2001;38(7):757-762.

6. Ogunlesi TA, Ogunfowora OB. Predictors of acute bilirubin encephalopathy among Nigerian term babies with moderate-to-severe hyperbilirubinaemia. *Journal of tropical pediatrics.* 2011;57(2):80-86.

7. Arnolda G, Nwe HM, Trevisanuto D, et al. Risk factors for acute bilirubin encephalopathy on admission to two Myanmar national paediatric hospitals. *Maternal health, neonatology and perinatology.* 2015;1:22.

8. Behjati-Ardakani S, Nikkhah A, Ashrafi MR, Sedaghat M. Association between total serum bilirubin level and manifestations of kernicterus. *Acta Medica Iranica.* 2006;44(6):405-408.

9. Ochigbo SO, Venn I, Anachuna K. Prevalence of bilirubin encephalopathy in calabar, south-south Nigeria: A five-year review study. *Iranian Journal of Neonatology.* 2016;7(1):9-12.

10. Morioka I, Nakamura H, Koda T, et al. Serum unbound bilirubin as a predictor for clinical kernicterus in extremely low birth weight infants at a late age in the neonatal intensive care unit. *Brain & development.* 2015;37(8):753-757.

11. ElTatawy SS, Elmazzahy EA, El Shennawy AM, Madani HA, Abou Youssef H, Iskander IF. The spectrum of bilirubin neurotoxicity in term and near-term babies with hyperbilirubinemia: Does outcome improve with time? *Early human development.* 2019;140:104909.

12. Colak R, Alkan Ozdemir S, Celik K, et al. Effects of high serum bilirubin levels on neurodevelopmental outcome at postnatal 12 and 24 months. *European journal of pediatrics.* 2016;175(11):1683-1684.

13. Hameed NN, Na' Ma AM, Vilms R, Bhutani VK. Severe neonatal hyperbilirubinemia and adverse short-term consequences in Baghdad, Iraq. *Neonatology.* 2011;100(1):57-63.

14. Iskander I, Gamaleldin R, El Houchi S, et al. Serum bilirubin and bilirubin/albumin ratio as predictors of bilirubin encephalopathy. *Pediatrics.* 2014;134(5):e1330-1339.

15. Nabavi SS, Behzad Moghadam MH, Arab Hosseini MH, Vaezi M, Rajabi R. Evaluation of auditory brainstem responses (ABR) in healthy term infants with elevated bilirubin levels requiring exchange transfusion. *Journal of Zanjan University of Medical Sciences and Health Services.* 2011;19(75).

16. Unal S, Gurbuz F, Guven A, Kose G. Three years follow-up of term and near-term infants with extreme hyperbilirubinemia and predictive value of brain auditory evoke responses. *Early human development.* 2010;86:S88.

17. Zhang X, Zhang SH. Ratio of serum bilirubin total amount to plasma albumin in predicting bilirubin encephalopathy. *Chinese Journal of Clinical Rehabilitation.* 2005;9(31):181-183.

18. Donneborg ML, Hansen BM, Vandborg PK, Rodrigo-Domingo M, Ebbesen F. Extreme neonatal hyperbilirubinemia and kernicterus spectrum disorder in Denmark during the years 2000-2015. *Journal of perinatology : official journal of the California Perinatal Association.* 2020;40(2):194-202.

19. Ebbesen F, Bjerre JV, Vandborg PK. Relation between serum bilirubin levels >/=450 mumol/L and bilirubin encephalopathy; a Danish population-based study. *Acta paediatrica.* 2012;101(4):384-389.

20. Kumar M, Tripathi S, Singh SN, Anand V. Outcome of neonates with severe hyperbilirubinemia in a tertiary level neonatal unit of North India. *Clinical Epidemiology and Global Health.* 2016;4(2):51-56.

21. Nasiri J, Ghazavi M, Pourmirzaei M, Pak A. The causes and risk factors in patients with kernicterus referred to the clinic of pediatric neurology during the years 2011 to 2016. *Journal of Isfahan Medical School.* 2018;36(485):712-716.

22. Harris MC, Bernbaum JC, Polin JR, Zimmerman R, Polin RA. Developmental follow-up of breastfed term and near-term infants with marked hyperbilirubinemia. *Pediatrics.* 2001;107(5):1075-1080.

23. Ritter DA, Kenny JD, Norton HJ, Rudolph AJ. A prospective study of free bilirubin and other risk factors in the development of kernicterus in premature infants. *Pediatrics.* 1982;69(3):260-266.

**Appendix 6: eTable 2 - GRADE rating of certainty of evidence**

**Analysis 1. Association between total serum bilirubin value with KSD (Adjusted Odds ratio of KSD per unit rise in TSB)**

| **Prognostic factors: Association with Kernicterus spectrum disorder (KSD)** | No of studies (participants) | Phase of investigation | Study limitations (risk of bias) | Inconsistency | Indirectness | Imprecision | Publication bias | Moderate/large effect size | Dose effect | Overall certainty of evidence |
| --- | --- | --- | --- | --- | --- | --- | --- | --- | --- | --- |
| Total serum bilirubin value  Subgroup:  High-risk infants | 5 (4484) | √ | √ | X | √ | √ | √ | No | No | Moderate |
| Subgroup:  General group of infants | 1 (4320) | √ | X | √ | √ | √ | √ | No | No | Moderate |
| Subgroup:  Infant diagnosed with ABE | 1 (76) | √ | X | √ | √ | X | √ | No | No | Low |
| **Association with Sensorineural hearing loss** |  |  |  |  |  |  |  |  |  |  |
| Total serum bilirubin value  Subgroup: High-risk infants | 1 (2595) | √ | √ | V | V | X | √ | No | No | Moderate |
| Subgroup:  General group of infants | 1 (17260) | √ | X | √ | √ | X | √ | No | No | Low |

**Footnotes**

√ No serious concern, X Serious concern, XX Very serious concern, N/A: not applicable/unknown

**Analysis 2 Association between hyperbilirubinaemia status and KSD or developmental problems (Adjusted Odds ratio of KSD for infants with hyperbilirubinaemia versus those without)**

| **Outcome**  **(comparison between infants with hyperbilirubinaemia and those without)** | No of studies (participants) | Phase of investigation | Study limitations (risk of bias) | Inconsistency | Indirectness | Imprecision | Publication bias | Moderate/  large effect size | Dose effect | Overall certainty of evidence |
| --- | --- | --- | --- | --- | --- | --- | --- | --- | --- | --- |
| Cerebral palsy or other neurological diagnosis | 2 (56578) | √ | √ | √ | √ | X | √ | No | No | Moderate |
| Developmental delay or abnormal neurological examination | 2 (52837) | √ | √ | √ | √ | X | √ | No | No | Moderate |
| Developmental tests (SMD) | 4 (632) | √ | √ | √ | √ | X | √ | No | No | Moderate |
| Deafness | 1 (56019) | X | √ | √ | √ | X | √ | No | No | Low |
| Attention deficit disorder | 1 (56019) | X | √ | √ | √ | X | √ | No | No | Low |
| Autism spectrum disorder | 1 (56019) | X | √ | √ | √ | X | √ | No | No | Low |

**Footnotes**

√ No serious concern, X Serious concern, XX Very serious concern, N/A: not applicable/unknown

**Analysis 3 Comparison between infants with KSD and infants without: total serum bilirubin value (mg/dL)**

| **Prognostic factor (TSB) (univariate analysis)** | No of studies (participants) | Phase of investigation | Study limitations (risk of bias) | Inconsistency | Indirectness | Imprecision | Publication bias* | Moderate/large effect size | Dose effect | Overall certainty of evidence |
| --- | --- | --- | --- | --- | --- | --- | --- | --- | --- | --- |
| Subgroup: Preterm/LBW infants | 3 (294) | √ | X | √ | √ | √ | X | No | No | Low |
| Subgroup: Term or late-preterm infants | 5 (305) | √ | √ | √ | √ | √ | X | No | No | Moderate |
| Subgroup: Term and preterm infants | 1 (28) | √ | X | √ | √ | X | X | No | No | Very low |

**Footnotes**

√ No serious concern, X Serious concern, XX Very serious concern, N/A: not applicable/unknown

*We considered reporting or publication bias to be highly likely, as there are a number of studies that appeared relevant without suitable extractable data for meta-analysis. These included some of the included studies that we had to synthesise narratively. We downgrade here and not in other analyses as we considered total serum bilirubin data is routinely obtained in the daily care of the infants and standard univariate analyses as performed in the analysis here could be performed readily.

**Analysis 4 Association between demographic, clinical and laboratory factors with KSD**

| **Prognostic factors (association with Kernicterus spectrum disorder (KSD))** | No of studies (participants) | Phase of investigation | Study limitations (risk of bias) | Inconsistency | Indirectness* | Imprecision | Publication bias** | Moderate/  large effect size | Dose effect | Overall certainty of evidence |
| --- | --- | --- | --- | --- | --- | --- | --- | --- | --- | --- |
| **Maternal/demographic factors** |  |  |  |  |  |  |  |  |  |  |
| Advanced maternal age | 1 (517) | √ | √ | √ | √ | X | √ | No | No | Moderate |
| Low maternal education | 2 (3398) | √ | √ | √ | √ | X | √ | No | No | Moderate |
| Refugee status | 1 (115) | √ | √ | √ | √ | X | √ | No | No | Moderate |
| Incomplete antenatal visits | 1 (1040) | √ | X | √ | √ | X | √ | No | No | Low |
| Delay in receiving antenatal care | 1 (1040) | √ | X | √ | √ | X | √ | No | No | Low |
| Self-referral | 1 (582) | √ | √ | √ | √ | X | √ | No | No | Moderate |
| Out of hospital birth | 3 (1774) | √ | X | √ | √ | √ | √ | No | No | Moderate |
| Early discharge | 1 (115) | √ | √ | √ | √ | X | √ | No | No | Moderate |
| **Clinical factors** |  |  |  |  |  |  |  |  |  |  |
| Prematurity or low Birth weight | 2 (738) | √ | X | √ | √ | X | √ | No | No | Low |
| Asphyxia | 1 (64) | √ | √ | √ | √ | XX | √ | No | No | Low |
| Gastrointestinal obstruction | 1 (288) | √ | √ | √ | √ | XX | √ | No | No | Low |
| Sepsis  Subgroup:  Term and late-preterm infants with high TSB on admission | 1 (288) | √ | √ | √ | √ | XX | √ | No | No | Low |
| Sepsis  Subgroup:  Term and late-preterm infants diagnosed with ABE | 1 (87) | √ | X | √ | √ | XX | √ | No | No | Very low |
| Sepsis  Subgroup: ELBW infants | 1 (3246) | √ | √ | √ | √ | X | √ | No | No | Moderate |
| **Laboratory factors** |  |  |  |  |  |  |  |  |  |  |
| Acidosis | 1 (156) | √ | X | √ | √ | XX | √ | No | No | Very low |
| Hemolytic condition:  Rh incompatibility | 1 (288) | √ | √ | √ | √ | XX | √ | No | No | Low |
| Hemolytic condition:  ABO incompatibility | 1 (288) | √ | √ | √ | √ | XX | √ | No | No | Low |
| Hemolytic condition:  G6PD deficiency | 2 (403) | √ | √ | √ | √ | XX | √ | No | No | Low |
| Hemolytic condition:  Hereditary spherocytosis | 1 (288) | √ | √ | √ | √ | XX | √ | No | No | Low |
| Hemolytic condition not otherwise specified (Coomb’s positive) | 3 (1443) | √ | √ | √ | √ | X | √ | No | No | Moderate |
| Anaemia | 2 (444) | √ | √ | √ | √ | XX | √ | No | No | Low |
| Abnormal white cell count | 1 (517) | √ | √ | √ | X | XX | √ | No | No | Very low |
| Hypoglycaemia | 1 (156) | √ | X | √ | X | XX | √ | No | No | Very low |
| Serum albumin value | 1 (517) | √ | √ | √ | X | √ | √ | No | No | Moderate |

**Footnotes**

√ No serious concern, X Serious concern, XX Very serious concern, N/A: not applicable/unknown

*We considered a parameter to have serious concern on indirectness if the parameters were not routinely considered as directly relevant in decision-making in the day-to-day management of newborn with hyperbilirubinaemia.

**Although we considered more similar studies should have been published as the parameters gathered were common parameters in daily practice, we agreed that that might be issues with reliability of data and access to expertise in data collection and analyses, especially when analysed as part of multivariate analyses with total serum bilirubin as a parameter. Because of this, there is no reliable way of determining the basis on which to judge the likelihood of publication bias. Consequently, we have chosen not to downgrade any parameter in this domain.
